# Supplementary material for: Characterisation and reproducibility of the HumanMethylationEPIC v2.0 BeadChip for DNA methylation profiling
Source: Springer Nature journal article supplement (doi:10.1186/s12864-024-10027-5), 2024-03-06
Supplement: 12864_2024_10027_MOESM5_ESM.pdf [file 12864_2024_10027_MOESM5_ESM.pdf]

# Technical Note: Characterisation and reproducibility of the HumanMethylationEPIC v2.0 BeadChip for DNA methylation profiling

Heading descriptors for the additional columns added to EPICv2 manifest EPIC-8v2-0\_A1.csv

**CpG\_chrm, CpG\_beg, CpG\_end** – EPICv2 coordinates from Sesame manifest

**MismatchPos** – vector of probes where “Y” indicates discrepant genomic position between Sesame and Illumina, includes those that are missing mapping information in Illumina manifest (chr0)

**MissingPos** - vector of probes where “Y” indicates probes missing mapping information in Illumina manifest

**namerep** – vector of probes where “Y” indicates probes that have replicates based on probe name match (this vector can be married up with **Name** column to select a single probe to represent each name replicate)

**seqrep** – vector of probes where “Y” indicates probes that have exact sequence matches with other probes within EPICv2

**seqrep\_IlmnIDs** - IlmnIDs of those probes with exact sequence matches with other probes within EPICv2 (corresponding to **seqrep**)

**seqrep\_RepNum** – replicate number of those probes with exact sequence matches with other probes within EPICv2 (corresponding to **seqrep** and **seqrep\_IlmnIDs**). Can be used to e.g. filter for only 1 probe per sequence-replicate.

**posrep** – vector of probes where “Y” indicates probes that have exact genomic position matches with other probes within EPICv2 (based on Illumina genomic positions – note, none of the affected probes are discrepant with Sesame mapping)

**posrep\_IlmnIDs** - IlmnIDs of those probes with exact genomic position matches with other probes within EPICv2 (corresponding to **posrep**)

**posrep\_RepNum** – replicate number of those probes with exact genomic position matches with other probes within EPICv2 (corresponding to **posrep** and **posrep\_IlmnIDs**). Can be used to e.g. filter for only 1 probe per genomic-position-replicate.

**EPICv1probeID** – vector of EPICv1 probe names where probe names match between EPICv1 and EPICv2

**EPICv1seqmatch** - vector of EPICv1 probe names where probe sequences match between EPICv1 and EPICv2

**EPICv1locmatch** - vector of EPICv1 probe names where genomic locations match between EPICv1 and EPICv2 (based on Sesame locations)

**K450probeID** – vector of 450K probe names where probe names match between 450K and EPICv2

**K450seqmatch** - vector of 450K probe names where probe sequences match between 450K and EPICv2

**K450locmatch** - vector of 450K probe names where genomic locations match between 450K and EPICv2 (based on Sesame locations)

**K450locmatch2** - vector of 450K probe names where additional 450K probes have a genomic location match between 450K and EPICv2 (based on Sesame locations)

**K27probeID** - vector of 27K probe names where probe names match between 27K and EPICv2

**K27seqmatch** - vector of 27K probe names where probe sequences match between 27K and EPICv2

**K27locmatch** - vector of 27K probe names where genomic locations match between 27K and EPICv2 (based on Sesame locations)

**K27locmatch2** - vector of 27K probe names where additional 27K probes have a genomic location match between 27K and EPICv2 (based on Sesame locations)

**CH\_BLAT** – vector of probes where “Y” indicates at least one *in silico* cross-hybridisation event ( $\geq 47$  bp match) to a non-target region of the genome, predicted by BLAT. For a complete list of off-targets please see (Supplementary Table X).

**CH\_WGBS\_evidence** – subset vector of **CH\_BLAT** where “Y” indicates a greater affinity for the off-target(s), via comparison to whole genome bisulphite sequencing on matched samples

**RMSE\_with\_WGBS** – root mean squared error when comparing probe methylation to matched target CpG site methylation from WGBS (M-values)

**Num\_offtargets** – number of off-target *in silico* hybridisation events predicted by the probe sequence via BLAT

**Suggested\_offtarget** – if **CH\_WGBS\_evidence** == “Y”, the hg38 coordinate of the off-target cytosine conferring minimum RMSE with WGBS

**Rep\_results\_by\_NAME** – results of competitive comparison between replicates, with replicate probe sets defined by column **Name**

**Rep\_results\_by\_SEQUENCE** - results of competitive comparison between replicates, with replicate probe sets defined by column **seqrep\_IlmnIDs**

**Rep\_results\_by\_LOCATION** - results of competitive comparison between replicates, with replicate probe sets defined by column **posrep\_IlmnIDs**
