# Supplementary material for: Characterisation and reproducibility of the HumanMethylationEPIC v2.0 BeadChip for DNA methylation profiling
Source: Springer Nature journal article supplement (doi:10.1186/s12864-024-10027-5), 2024-03-06
Supplement: 12864_2024_10027_MOESM6_ESM.pdf [file 12864_2024_10027_MOESM6_ESM.pdf]

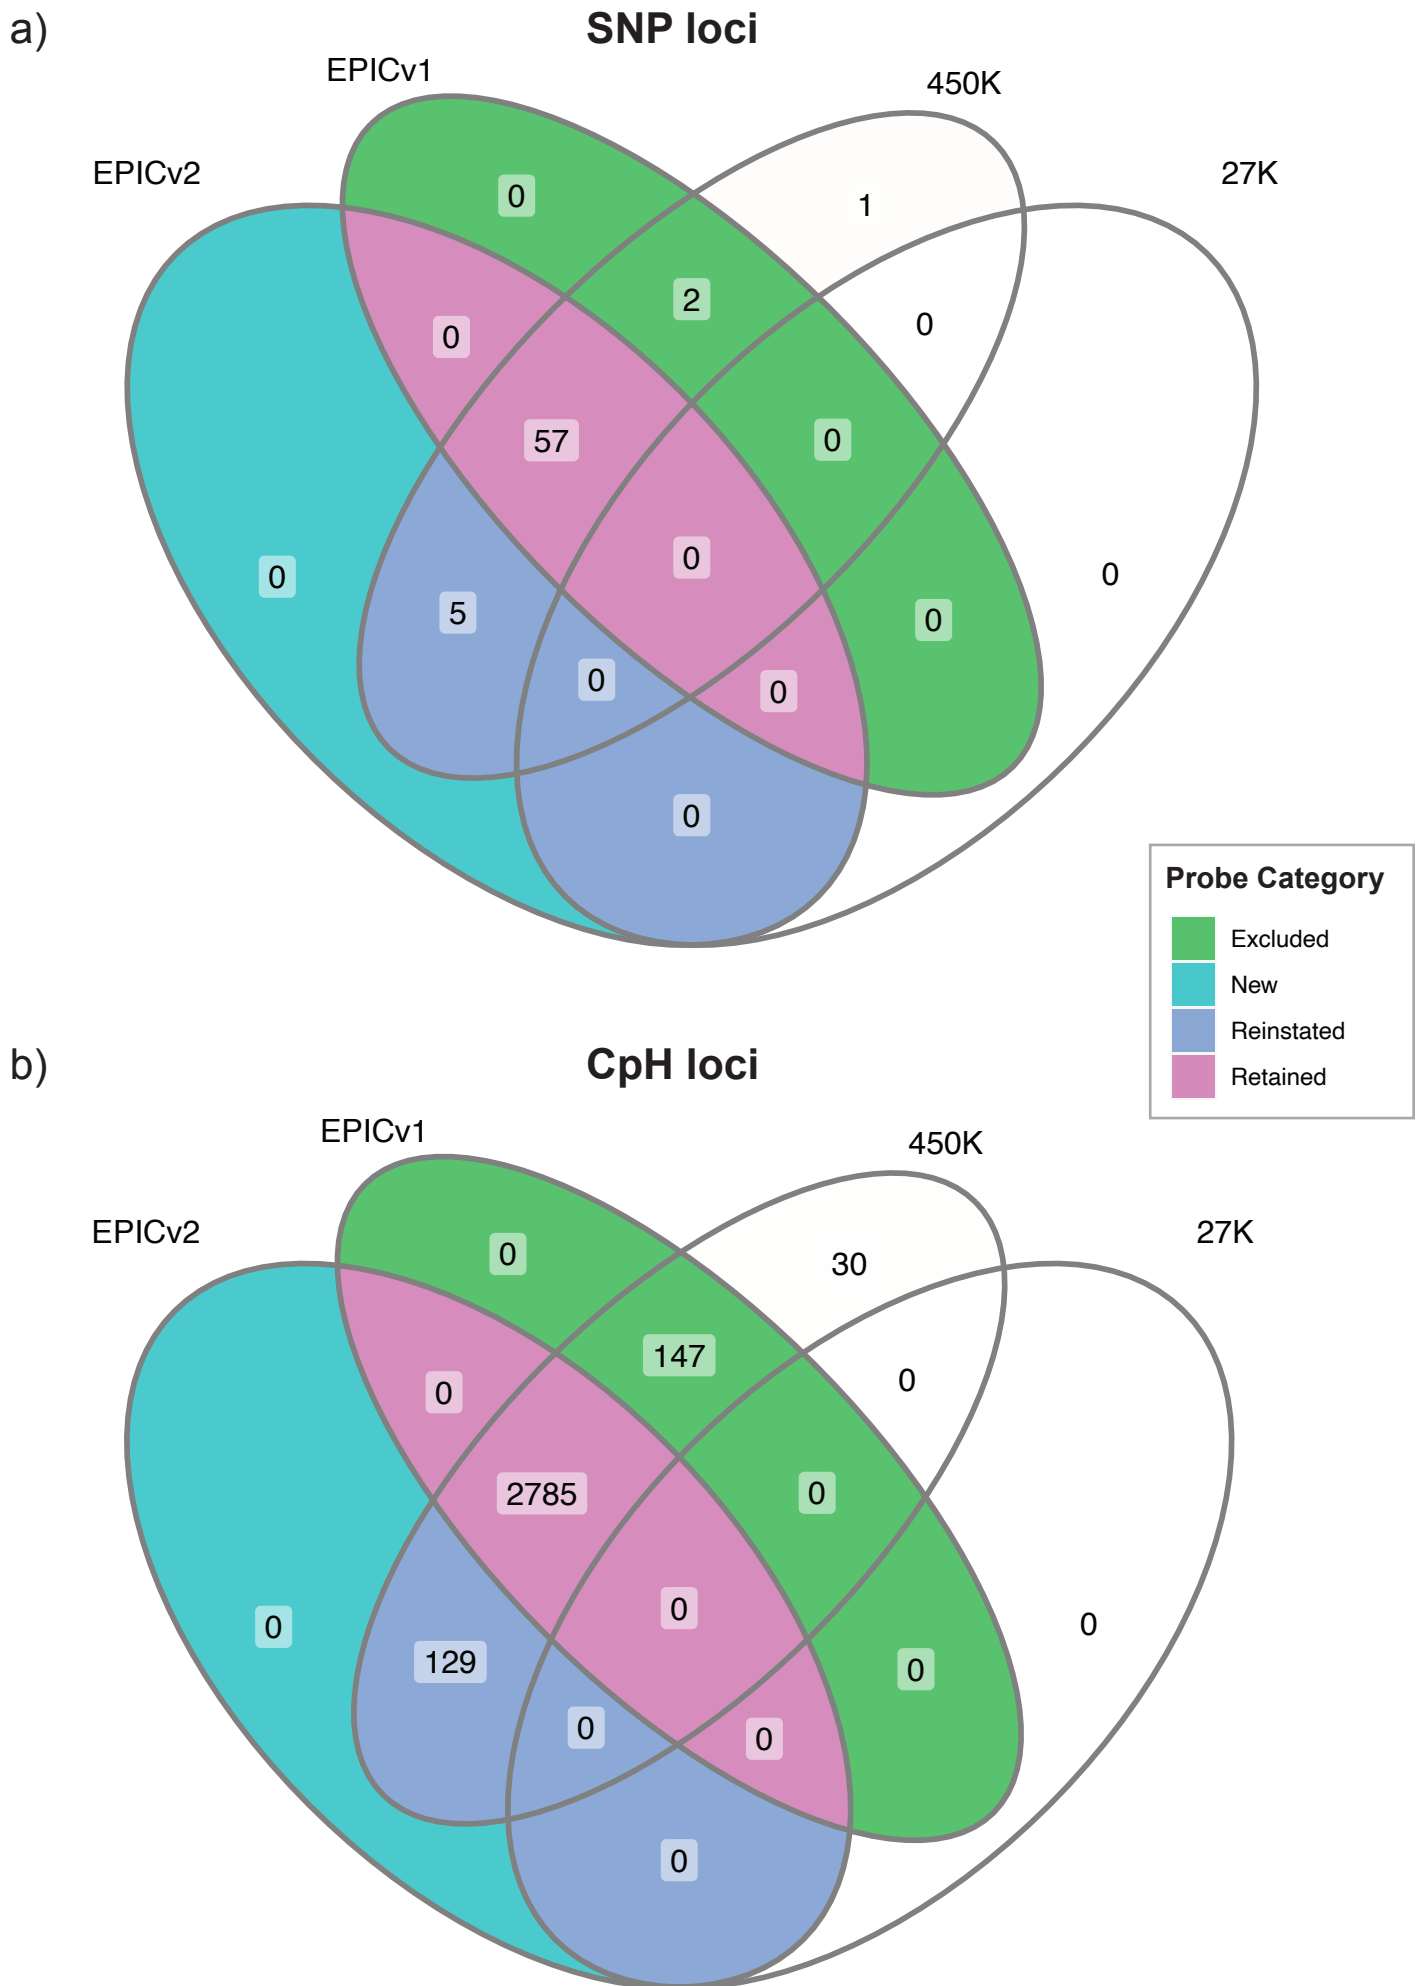

Supplementary Figure 1) Venn diagram showing overlap in a) SNP loci and b) CpH loci targeted by different versions of the Infinium methylation microarray. Note although EPICv2 includes 65 'rs' probes, 3 are replicates, therefore the 'rs' probes target 62 unique loci.

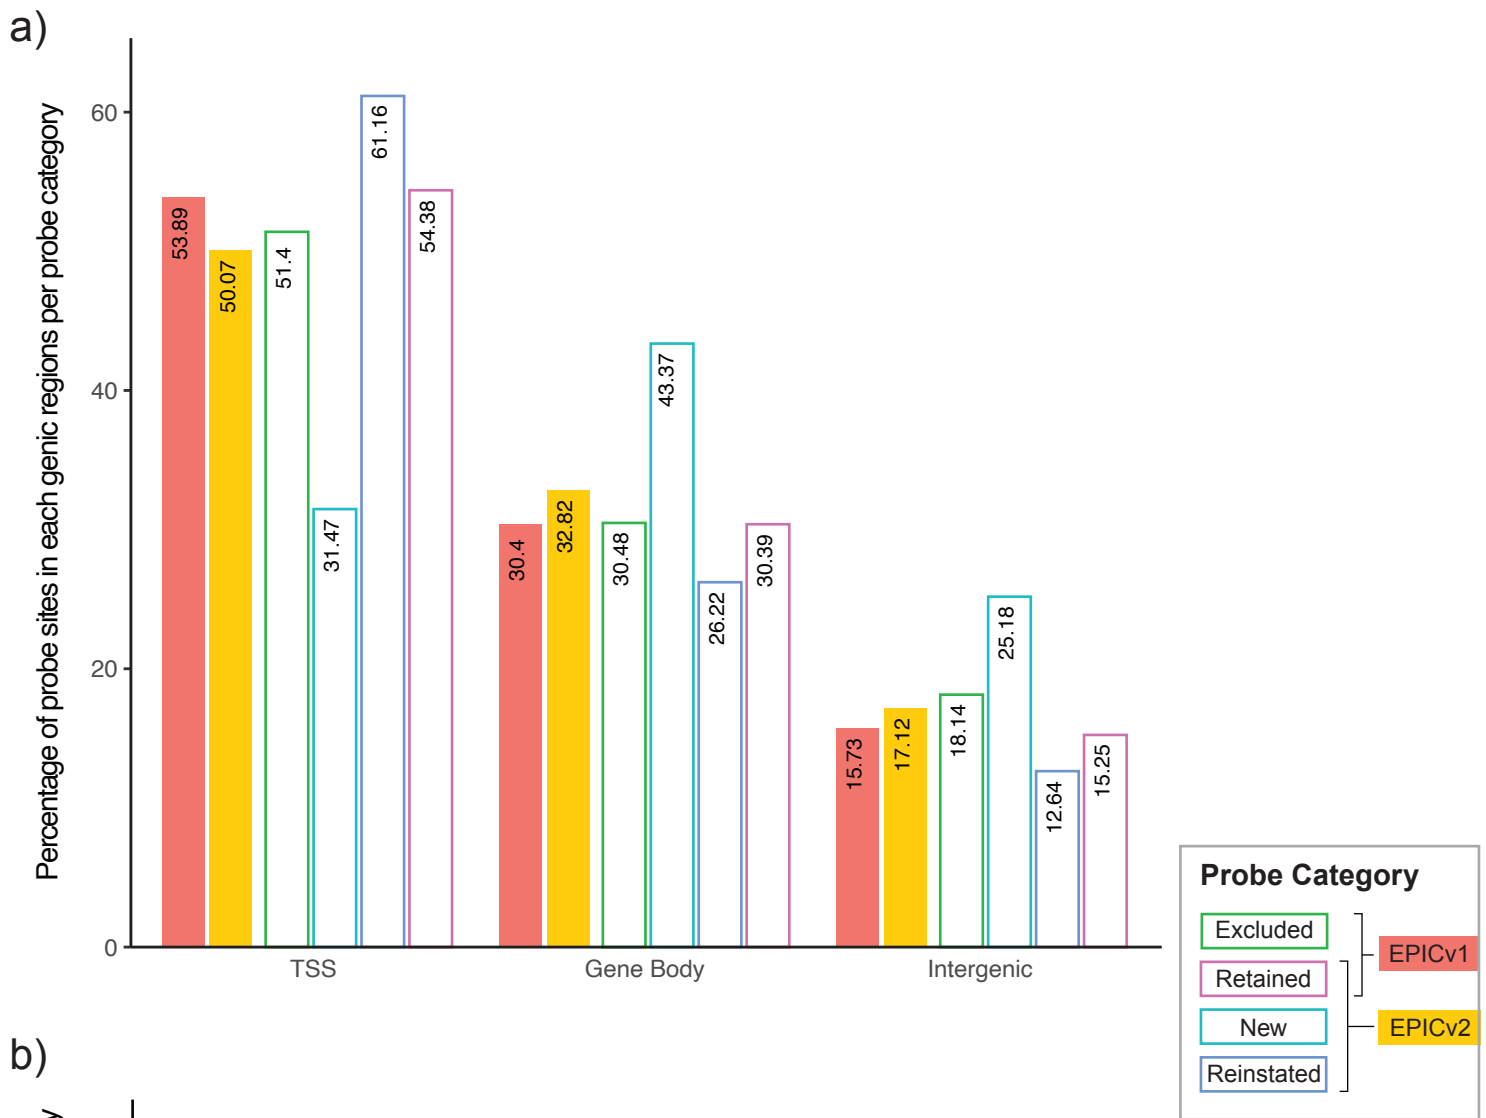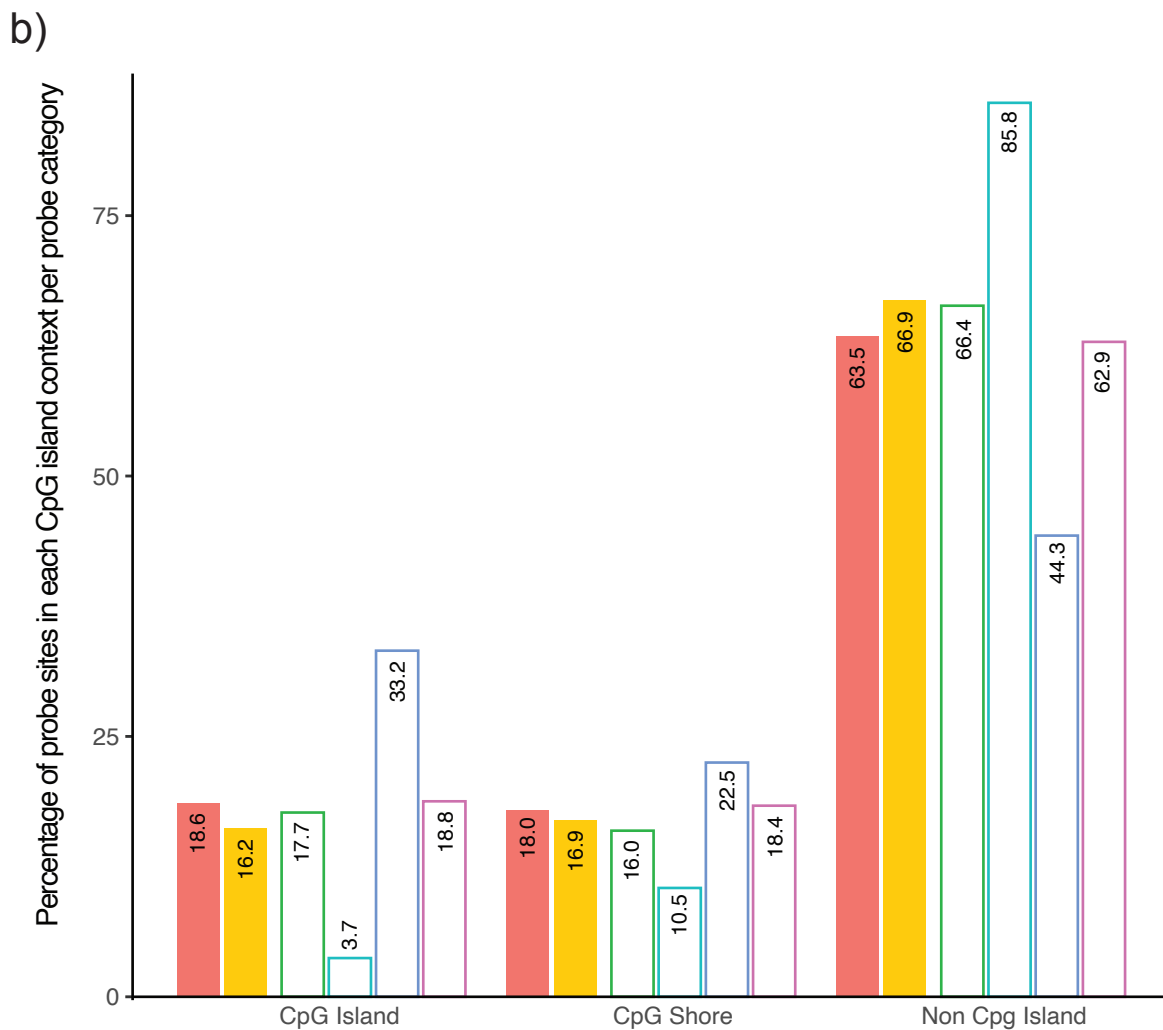

Supplementary Figure 2) Percentage of probe sites per probe category overlapping specific a) genic and b) CpG island contexts.

a) EPICv1

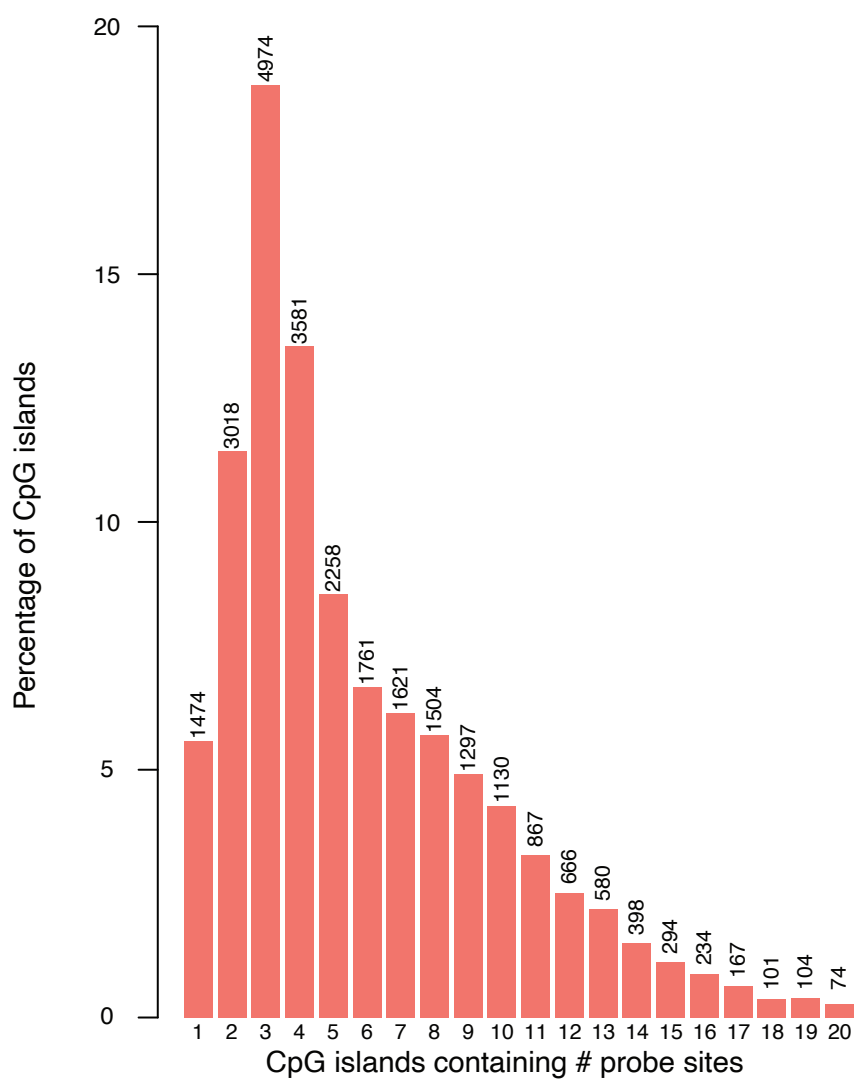

b) EPICv2

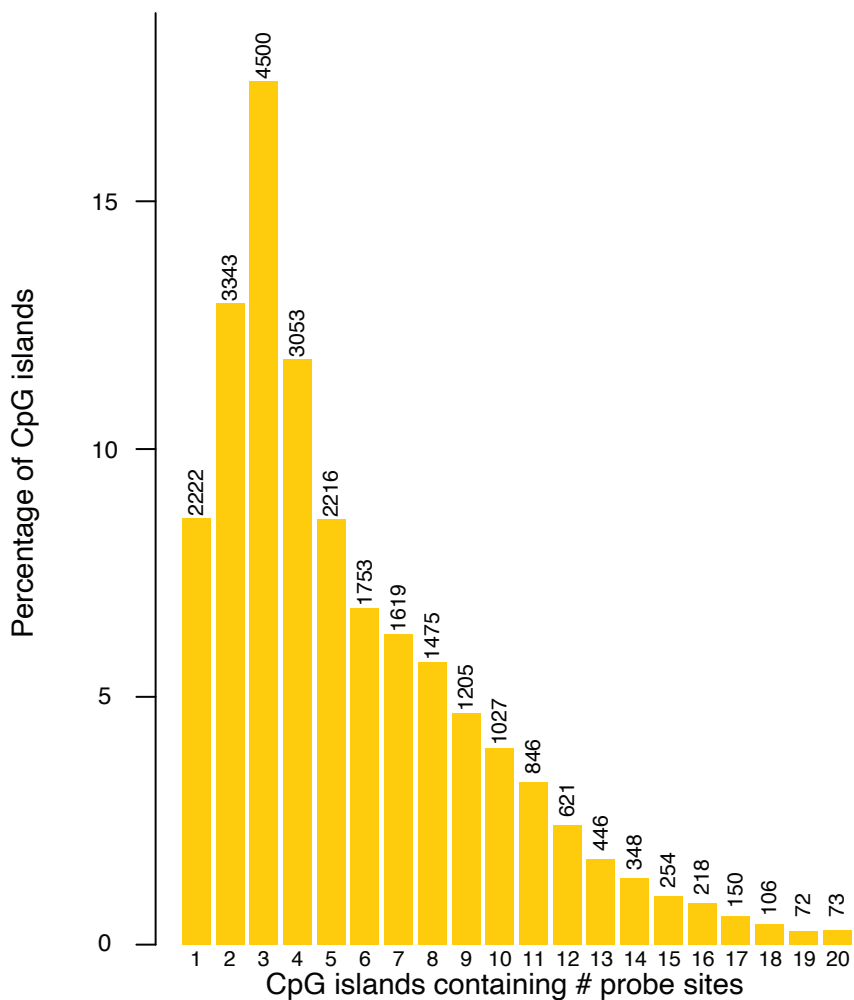

Supplementary Figure 3) Percentage (bars) and number (labels) of targeted CpG islands that overlap the specified number of probe sites on a) EPICv1 and b) EPICv2.

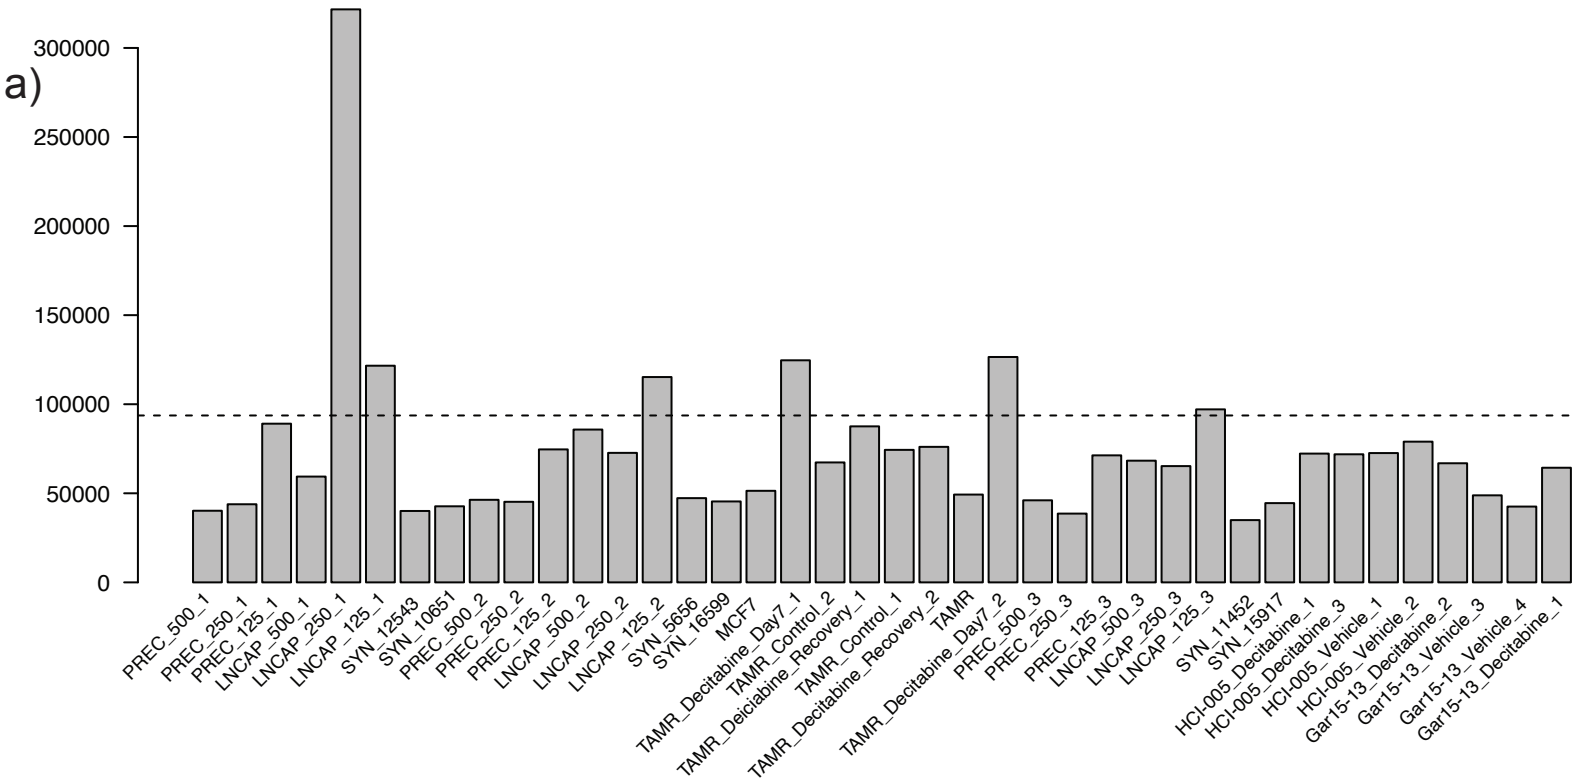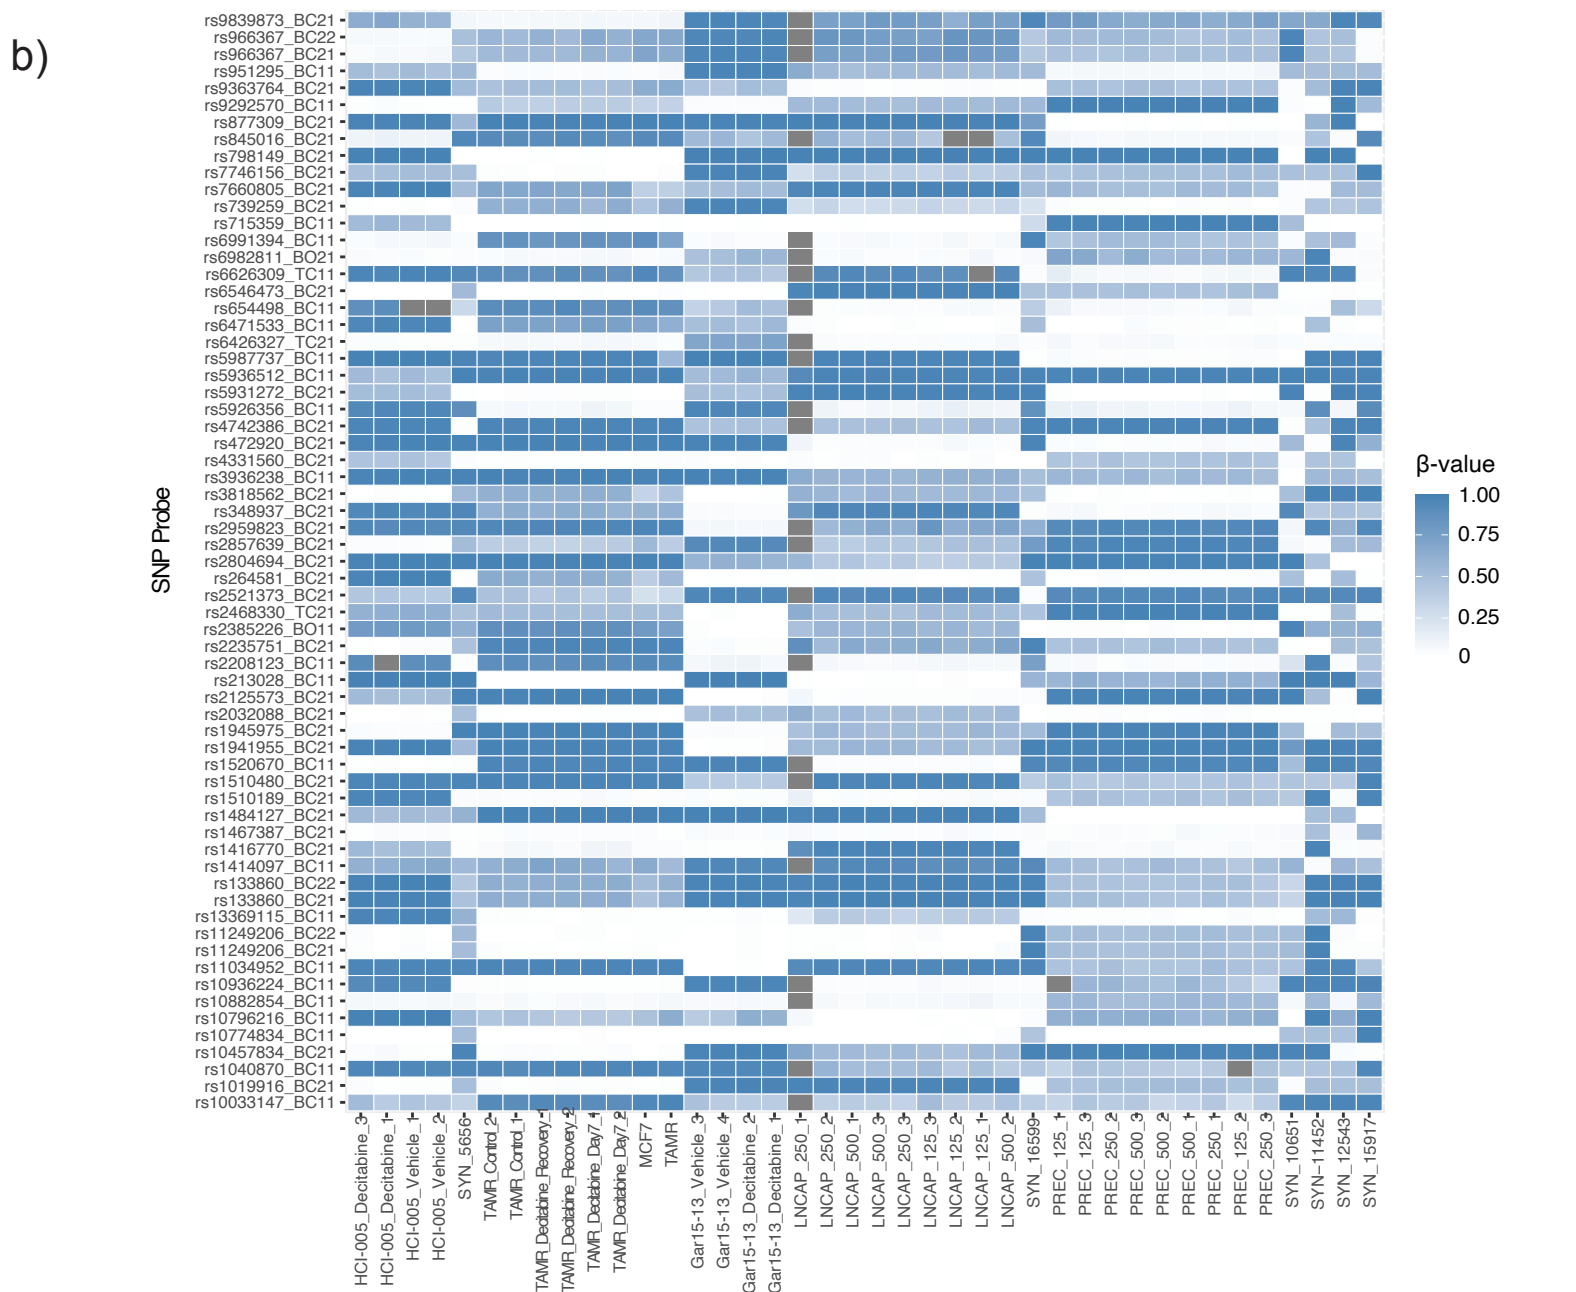

Supplementary Figure 4) a) Number of probes per sample with detection p-value > 0.05. Dashed line indicates 10% CpG site threshold at which samples typically removed from further analysis. b) Control SNP probes on the EPICv2 array correctly grouped samples by donor individual.

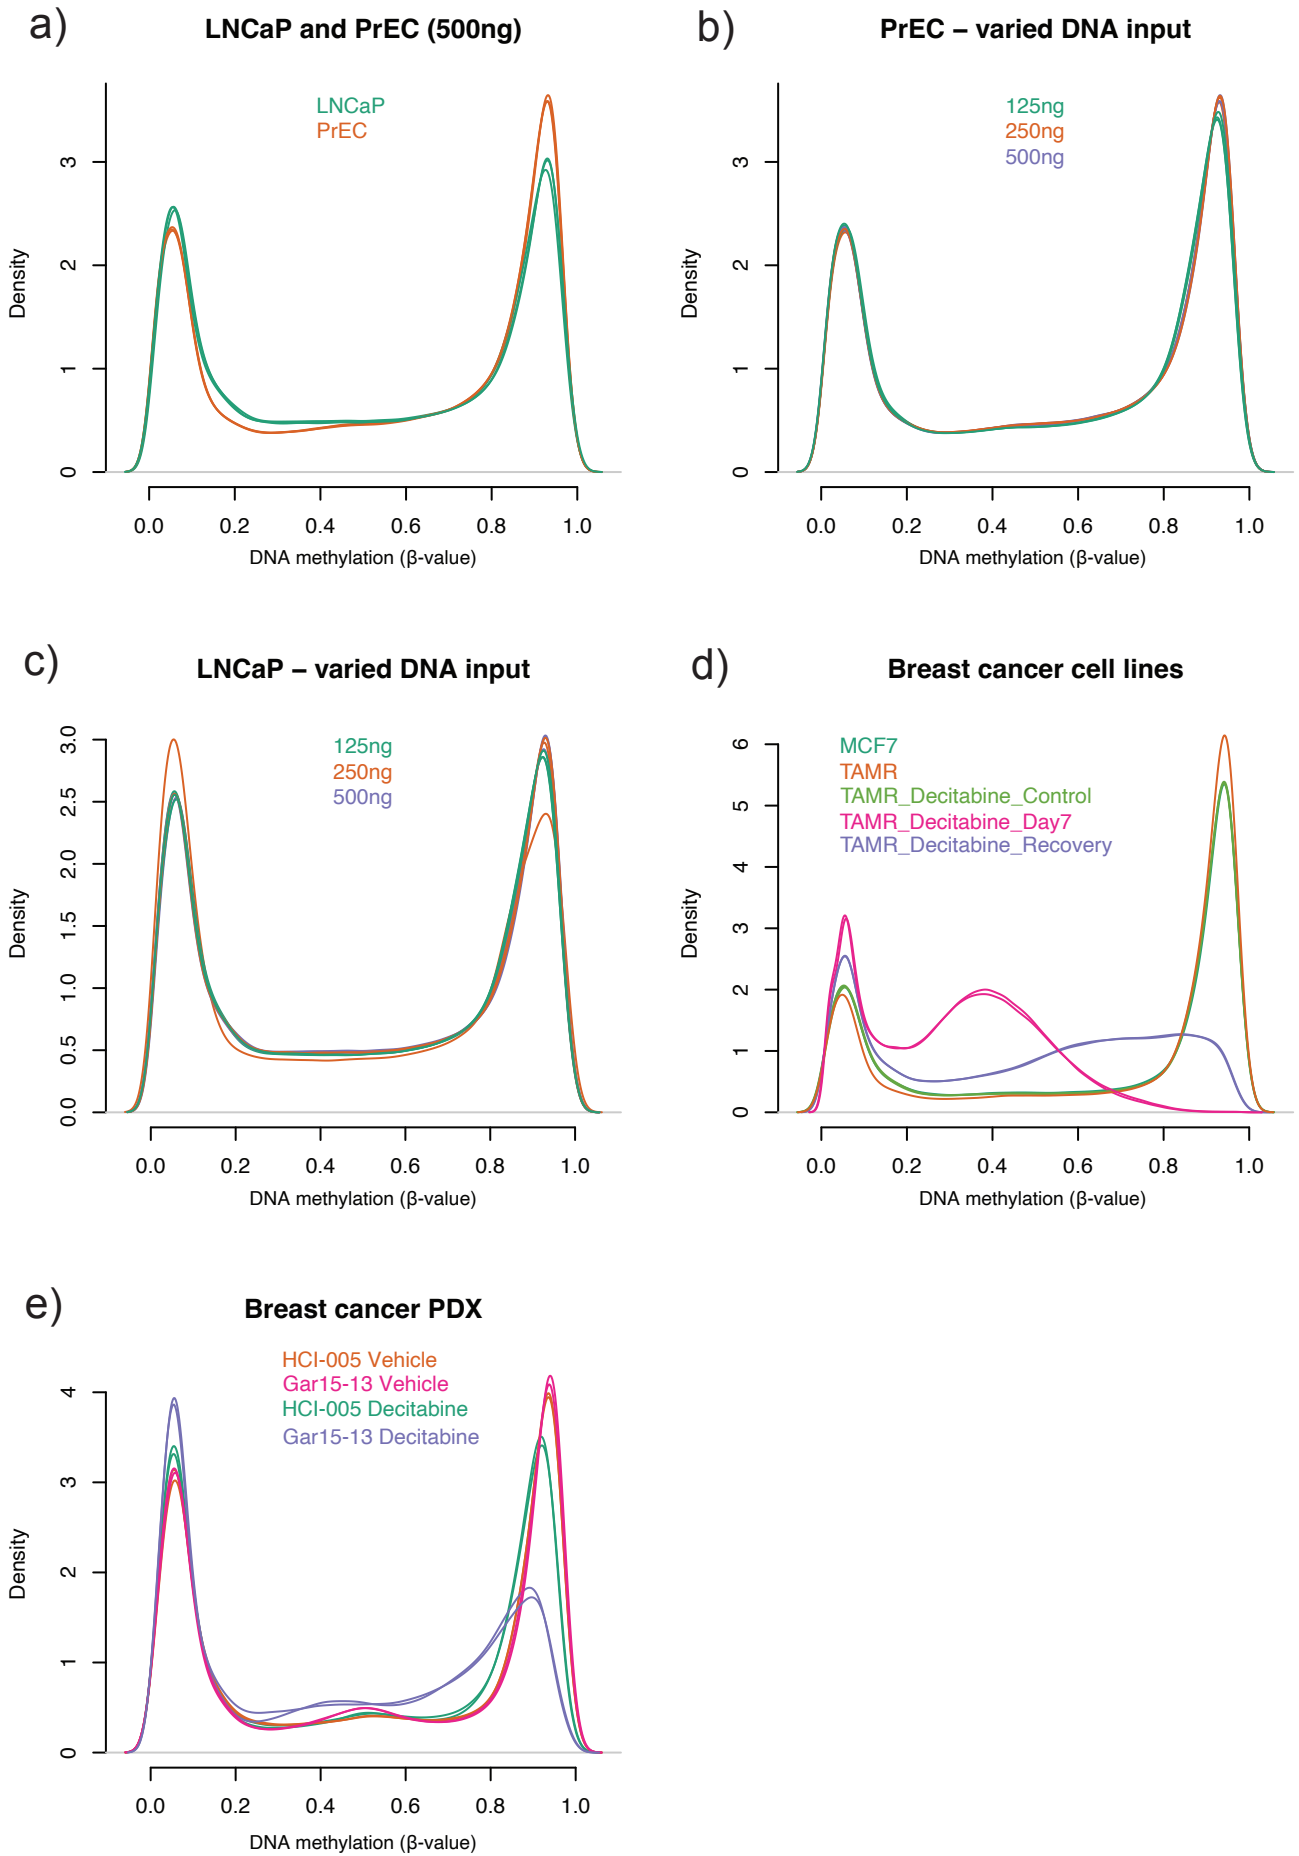

Supplementary Figure 5) Density plot of methylation values for samples profiled on EPICv2.

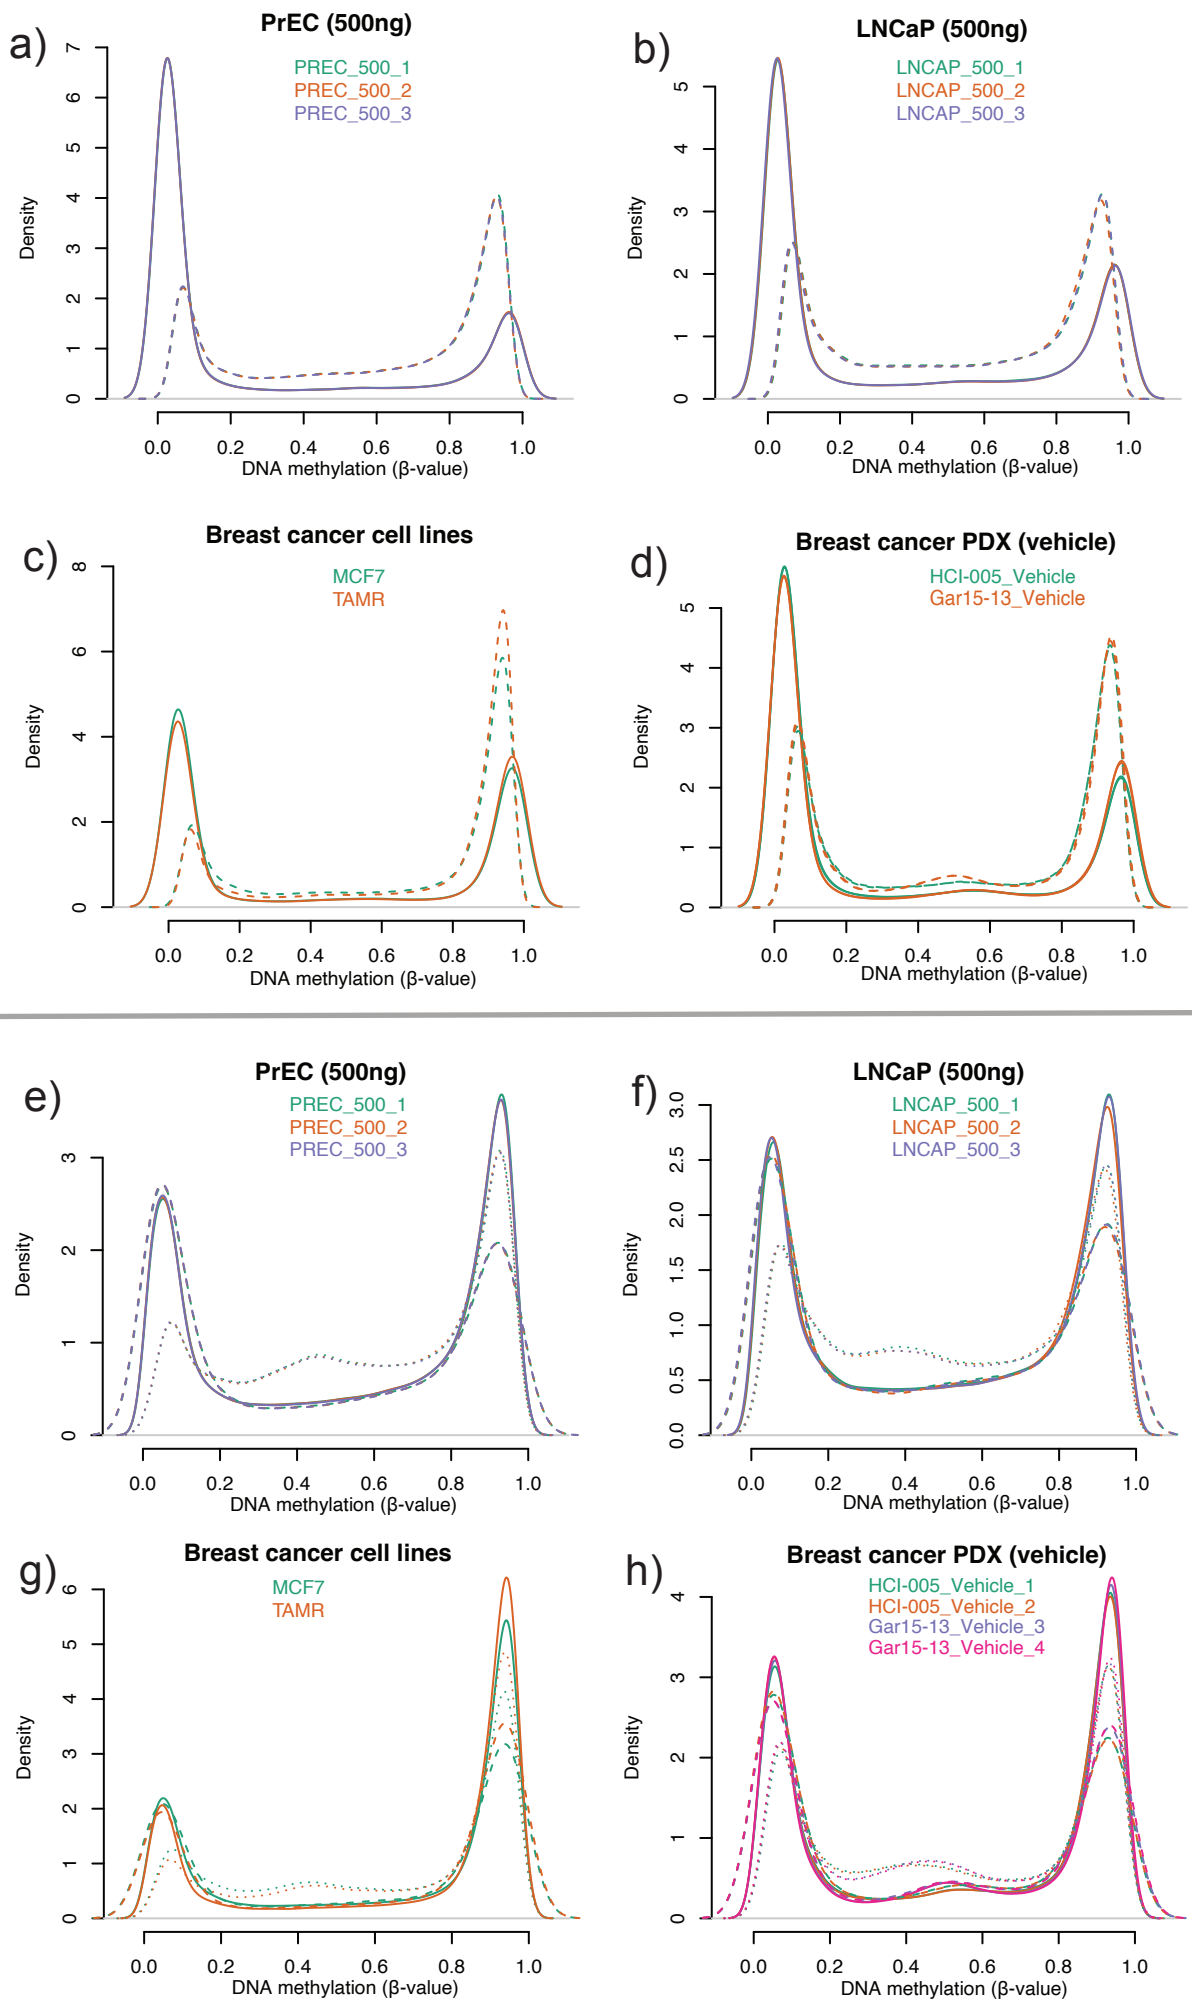

Supplementary Figure 6) Density plot of methylation values for samples profiled on EPICv2 split by a-d) Infinium probe design (Type I or II) and e-h) probe category (retained, reinstated or new).

PrEC (500ng)

LNCaP (500ng)

Breast cancer cell lines

Type I

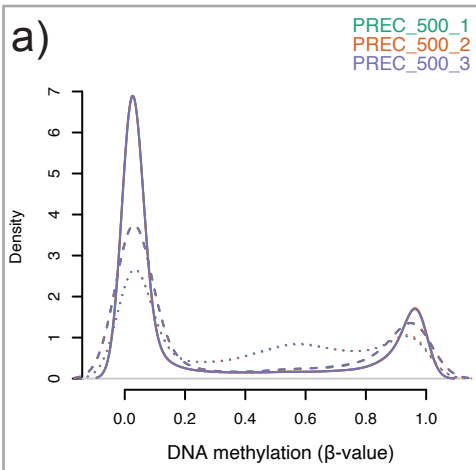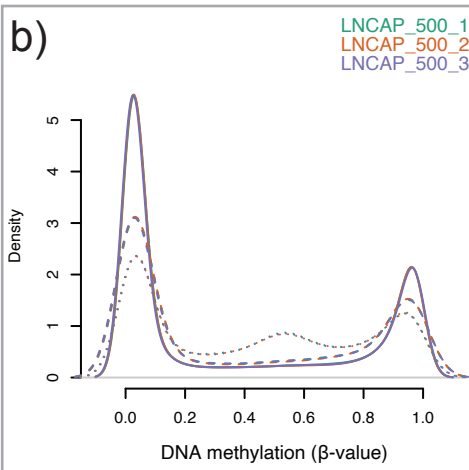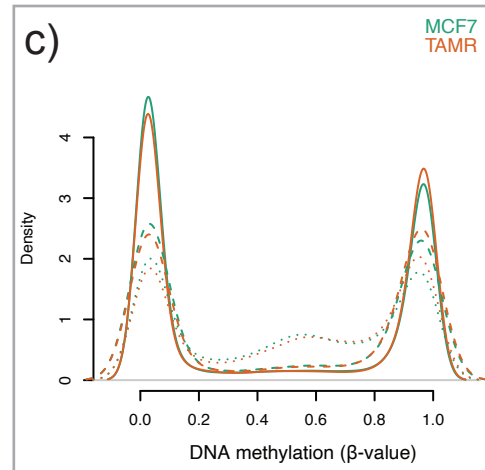

Type II

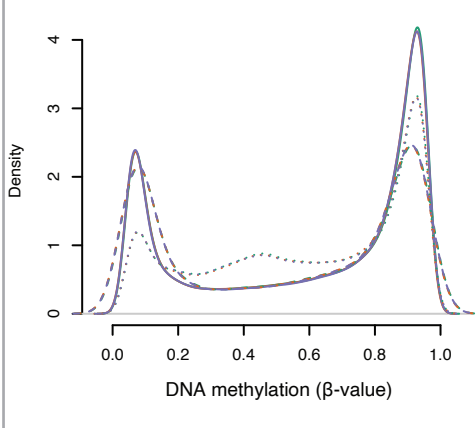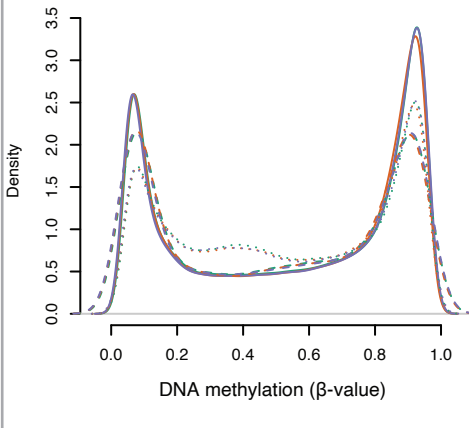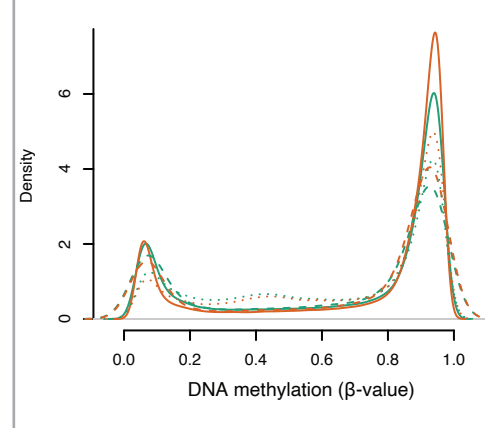

Breast cancer PDX (vehicle)

Prostate tumour tissue

Type I

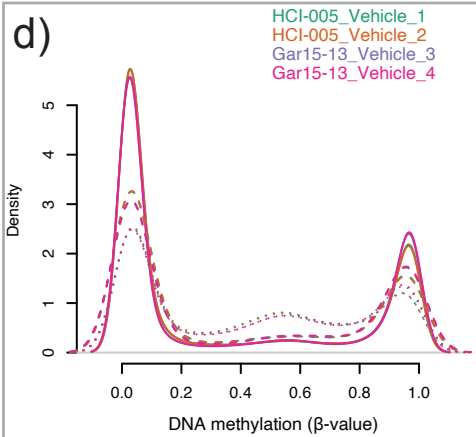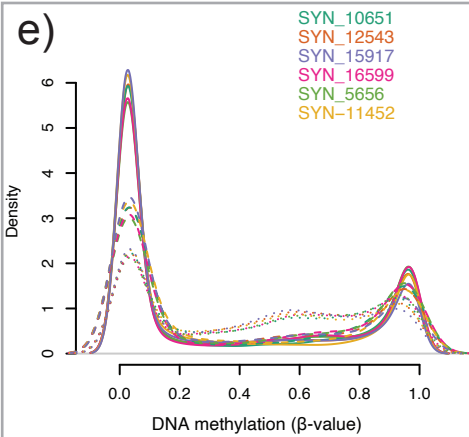

Type II

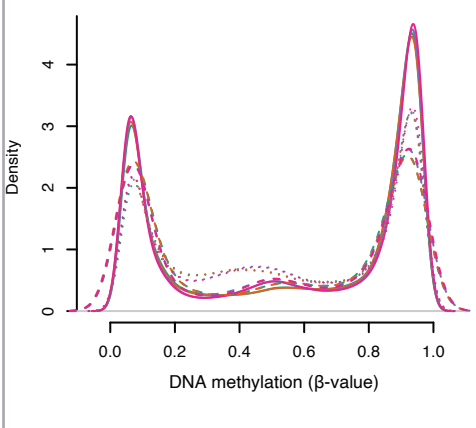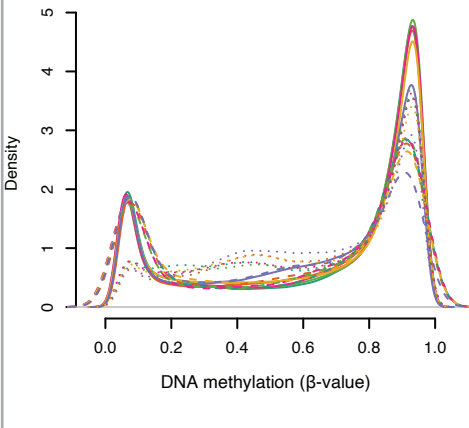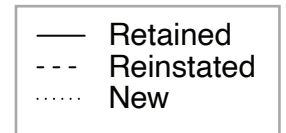

Supplementary Figure 7) Density plot of methylation values for samples profiled on EPICv2 split by both Infinium probe design and probe category (retained, reinstated or new).

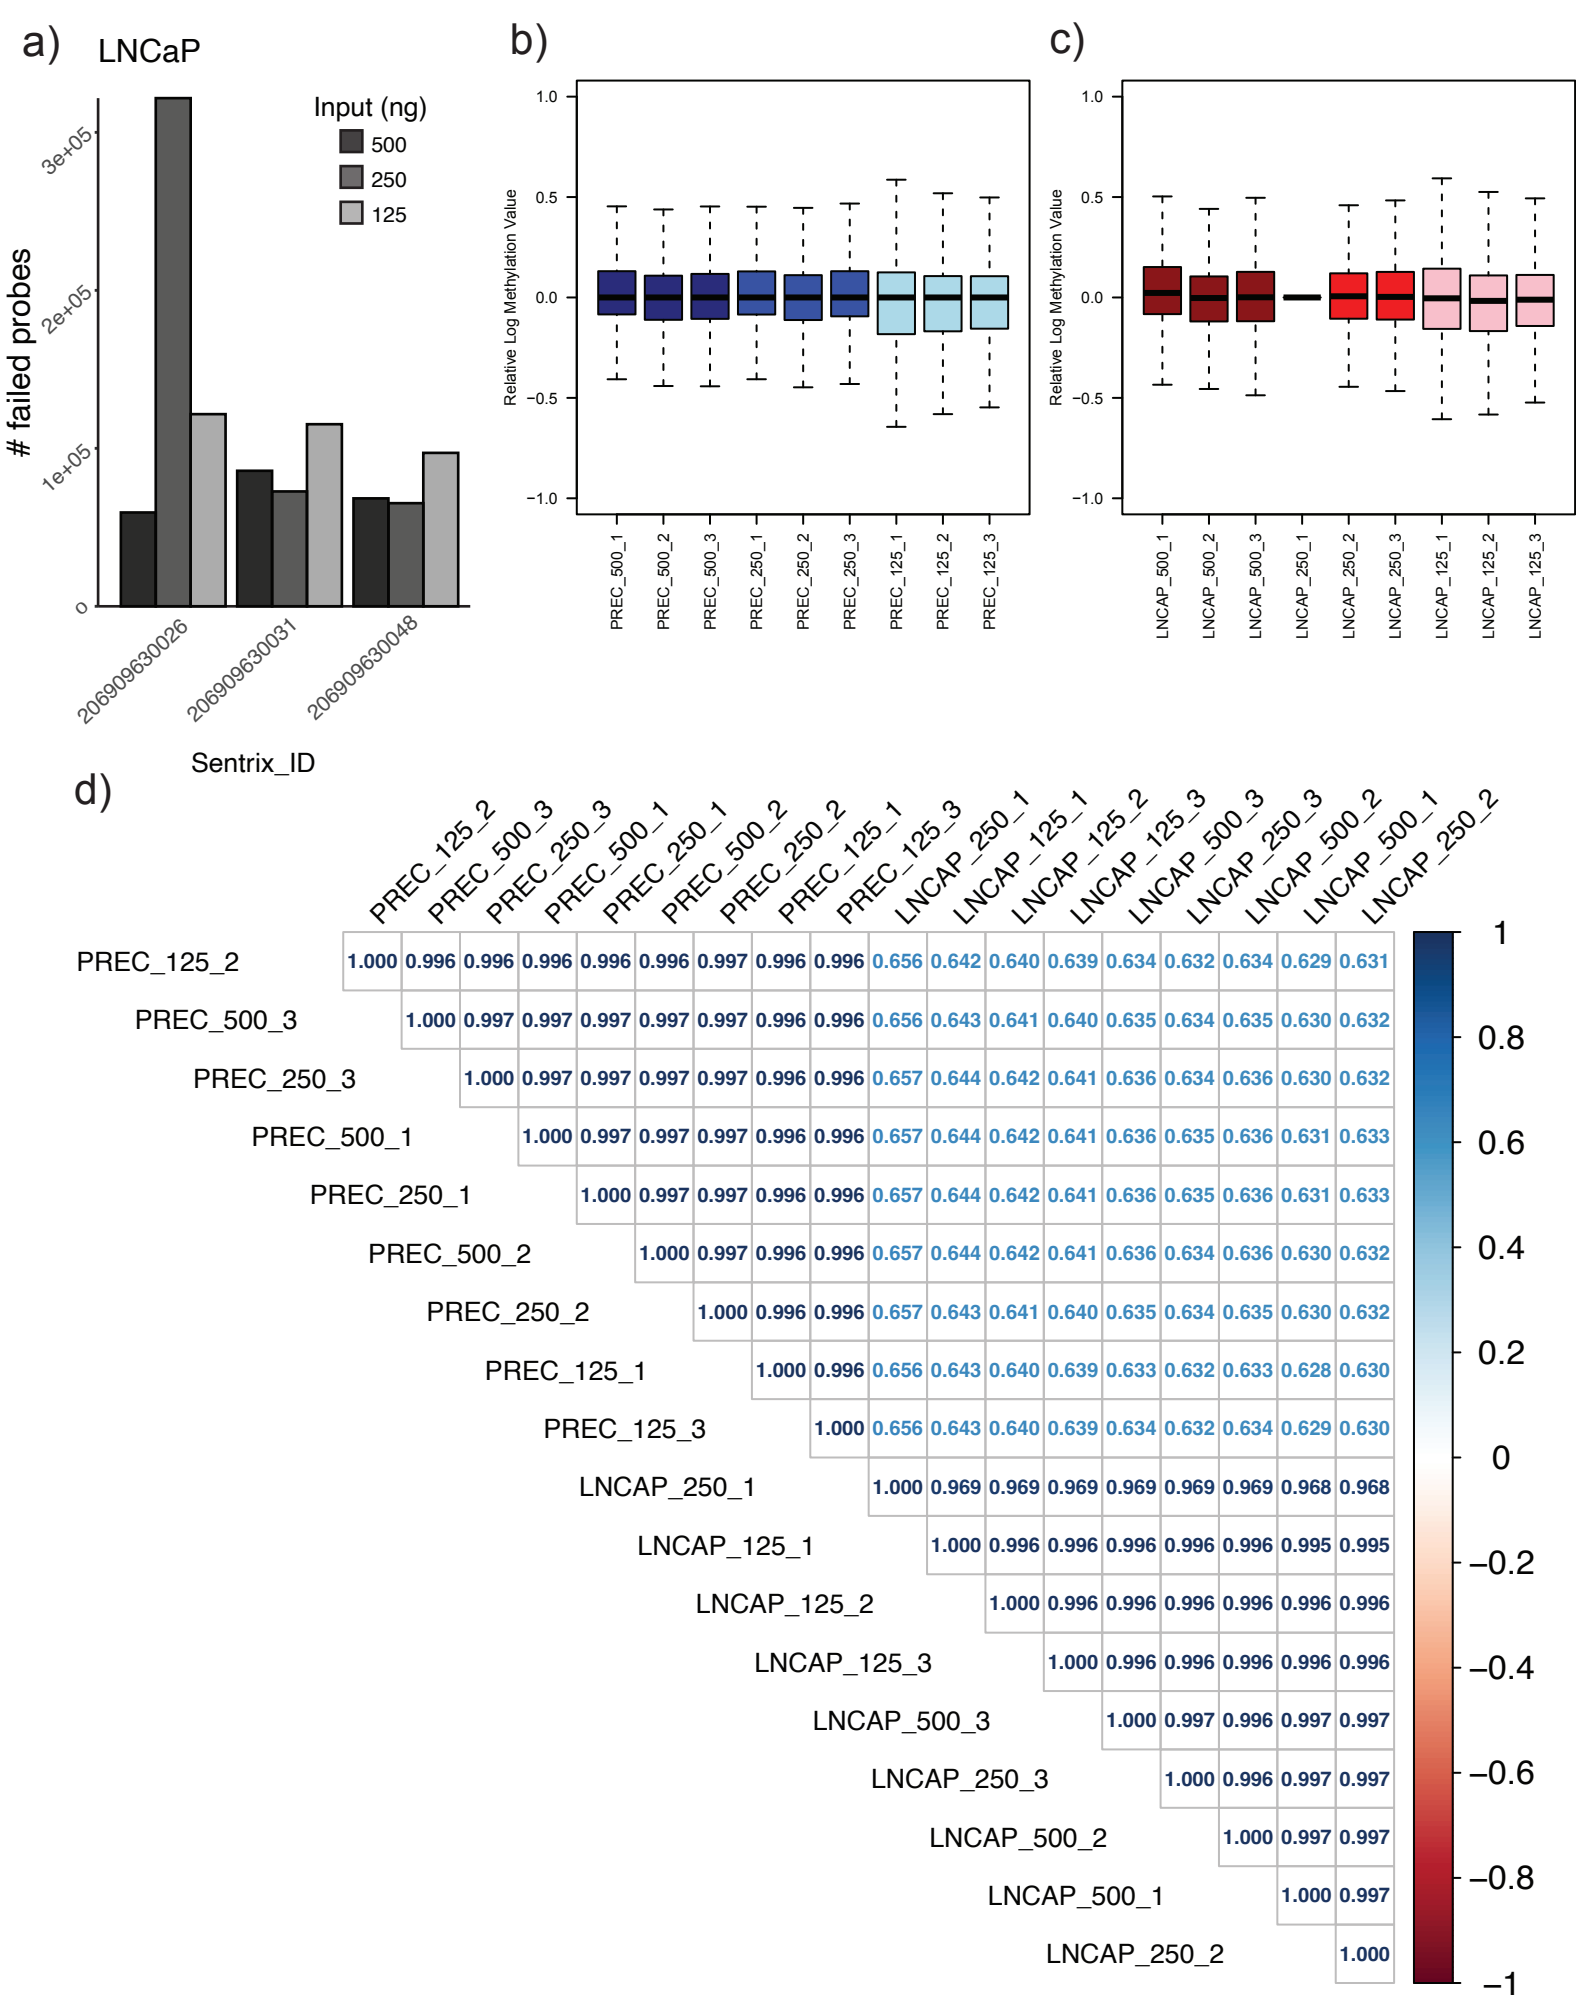

Supplementary Figure 8) Comparison of LNCaP technical replicates with varying DNA input levels showing a) number of probes with detection p-value >0.05, Relative Log Methylation plots of b) PrEC and c) LNCaP and d) correlation matrix of methylation values between technical replicates.



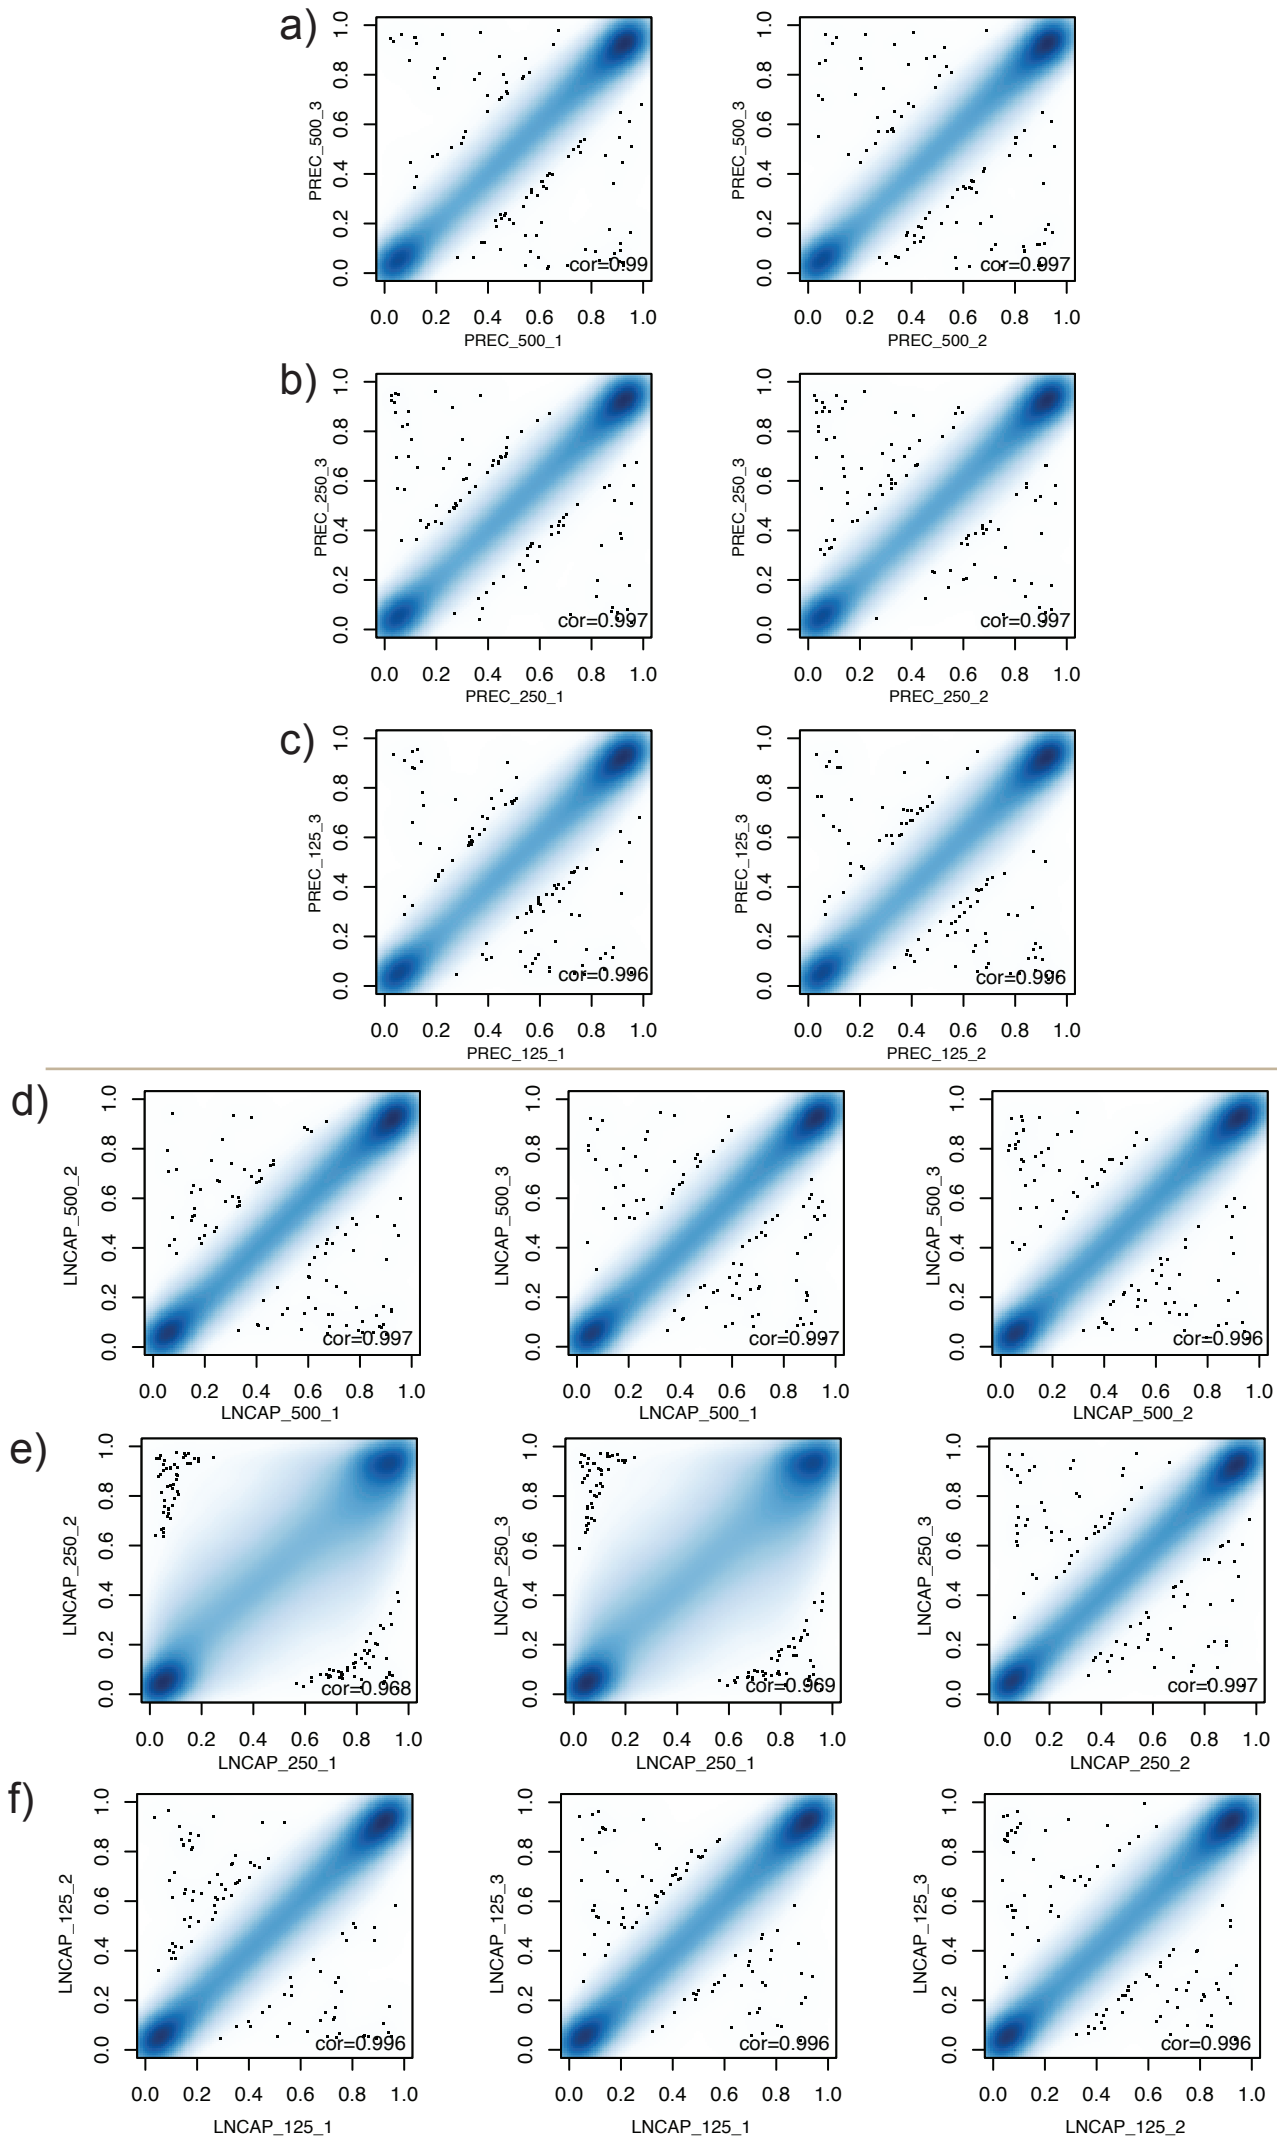

Supplementary Figure 9) Correlation plots of methylation  $\beta$ -value of technical replicates with varying DNA input levels for PREC a) 500ng, b) 250ng, c) 125ng, and LNCaP d) 500ng, e) 250ng, f) 125ng

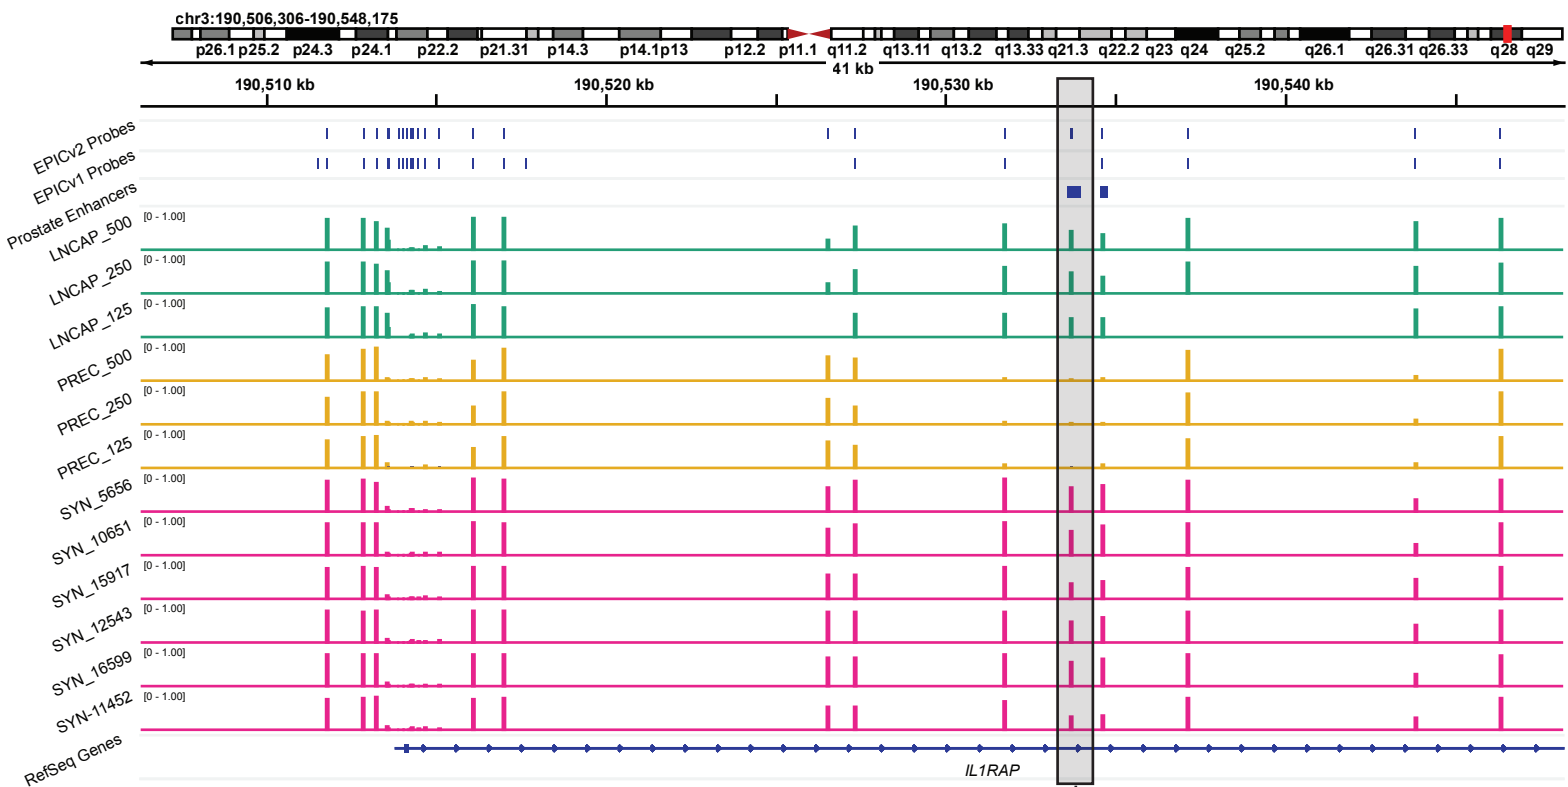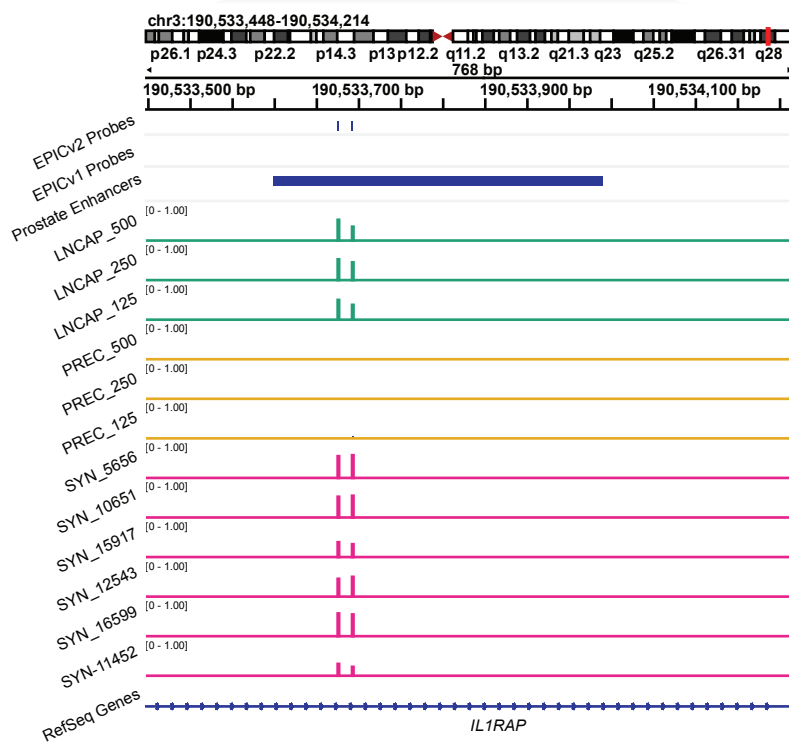

Supplementary Figure 10) Genome browser image showing methylation of prostate cancer tissue and cell line samples (of varying DNA input levels) at new EPICv2 site at FANTOM5 prostate enhancer region.

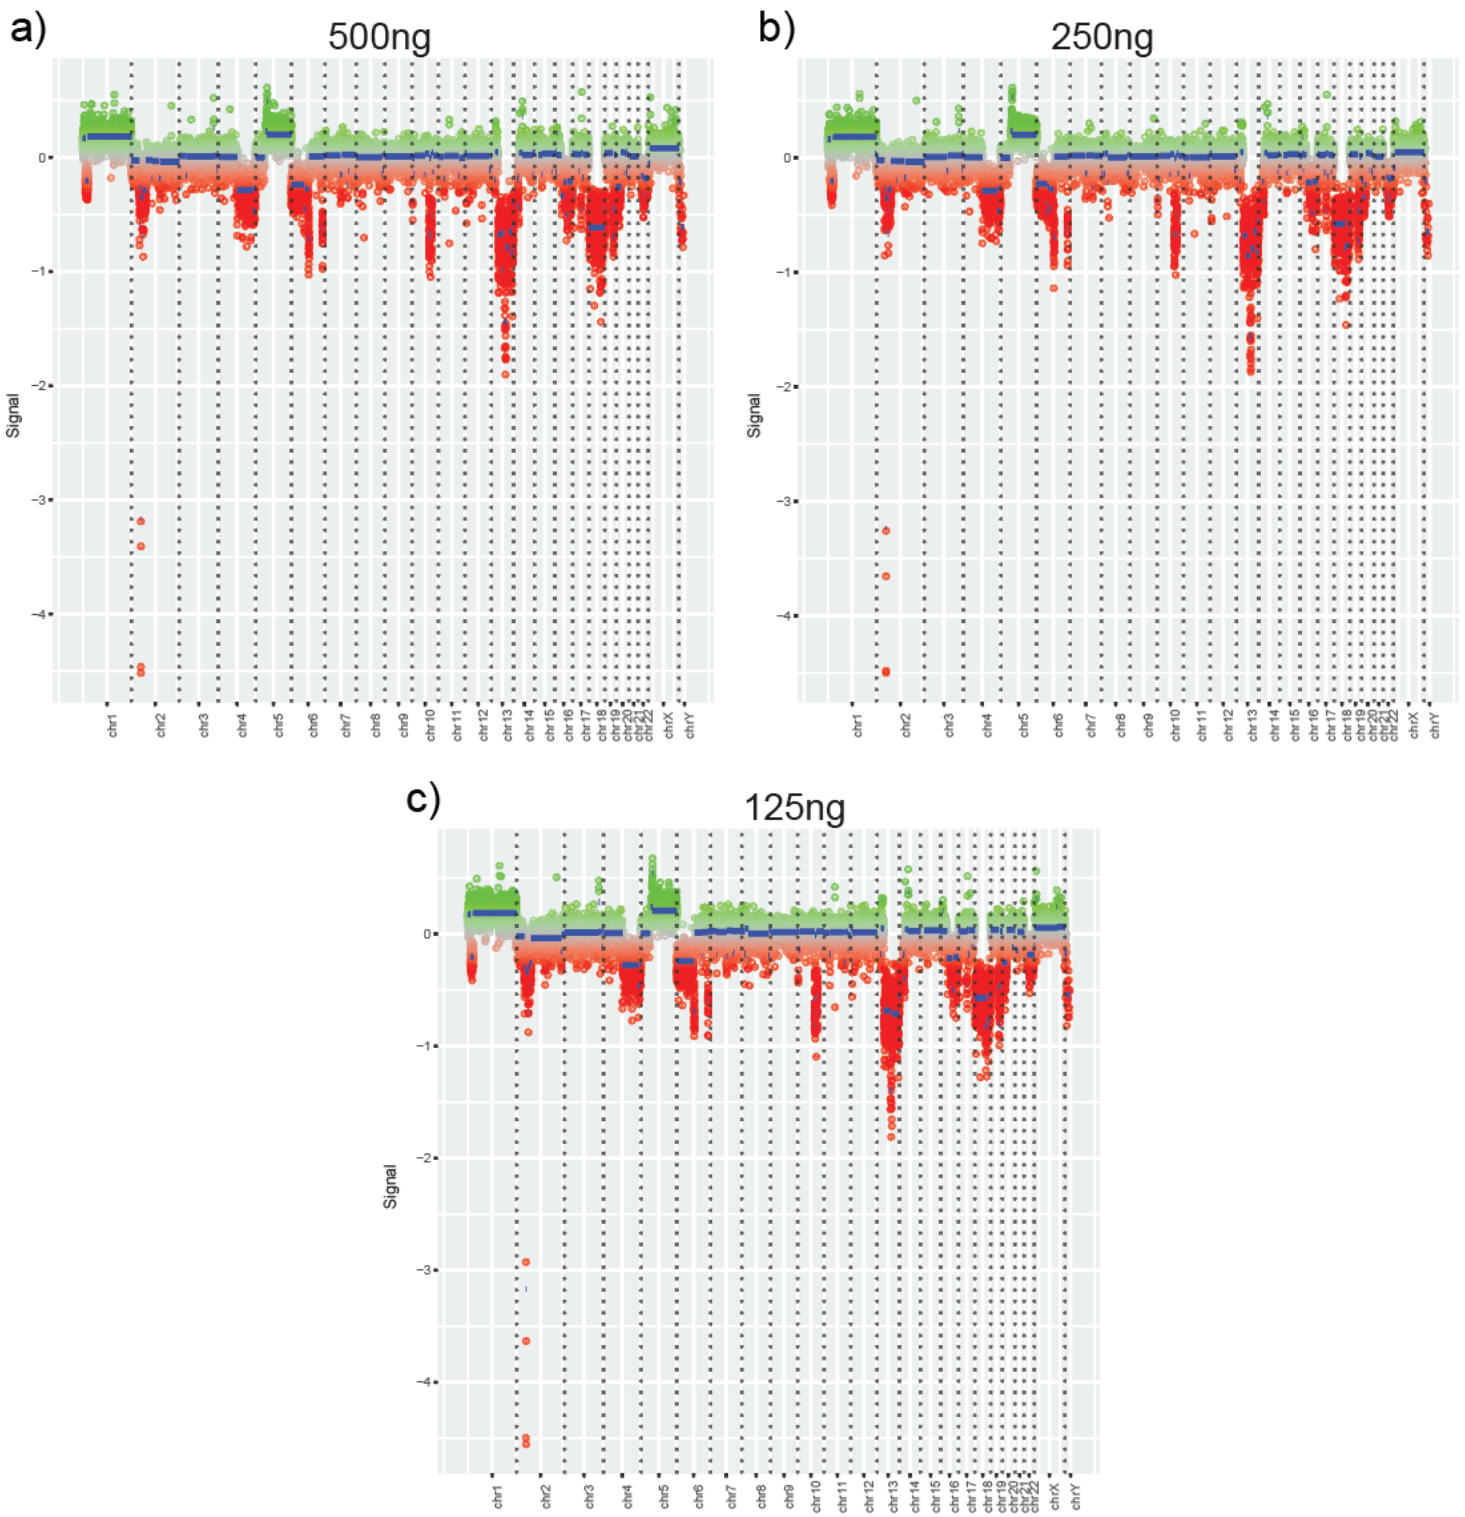

Supplementary Figure 11) Genomic copy number for LNCaP (using PrEC as a reference) at a range of DNA input levels: a) 500ng, b) 250ng and c) 125ng.

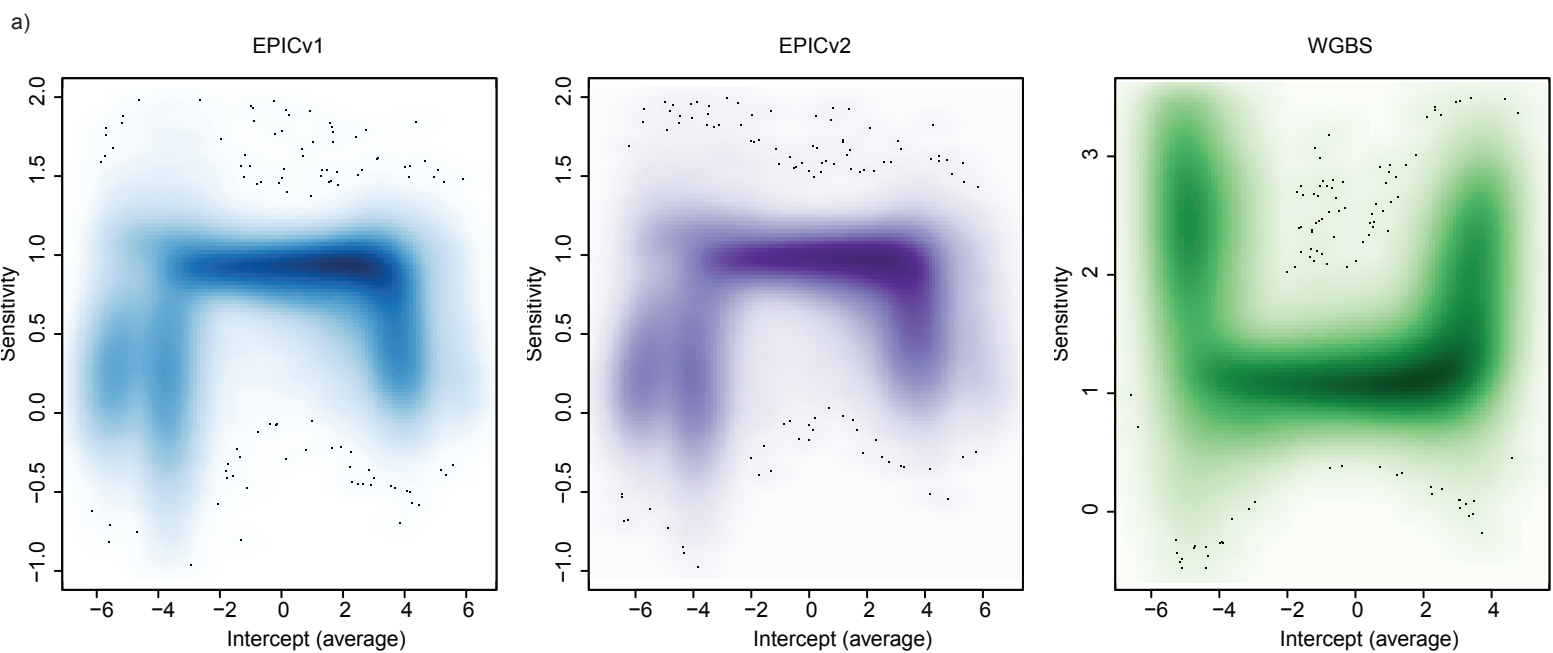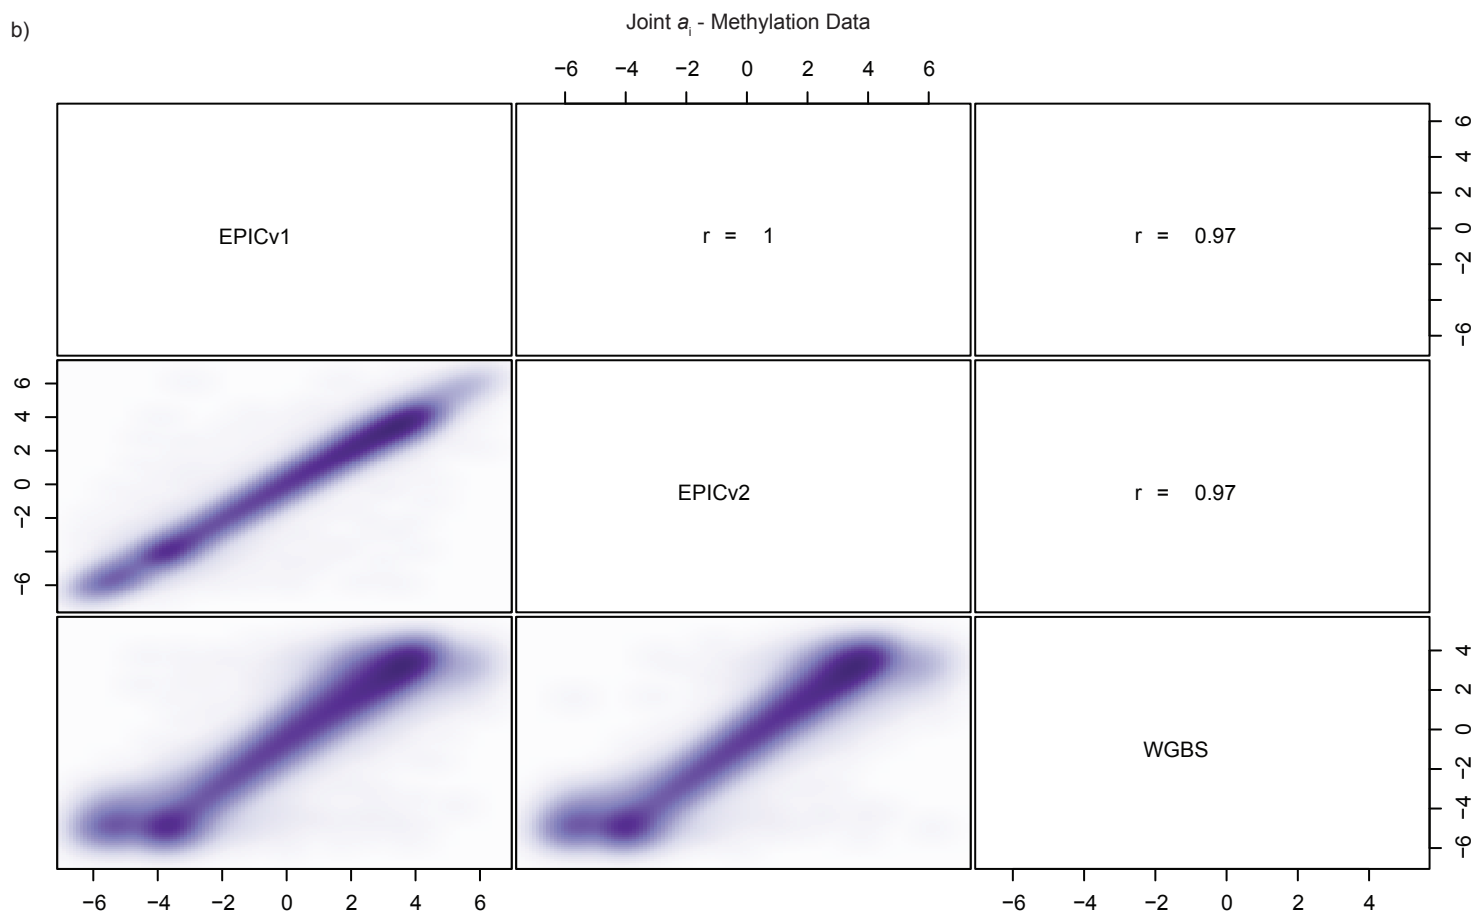

Supplementary Figure 12) a) Sensitivity as a function of row-linear intercept (M-value methylation domain) for the three platforms tested. b) Pairwise joint distributions of platform averages across all CpG sites tested.

a)

### Probe count per cross-reactivity

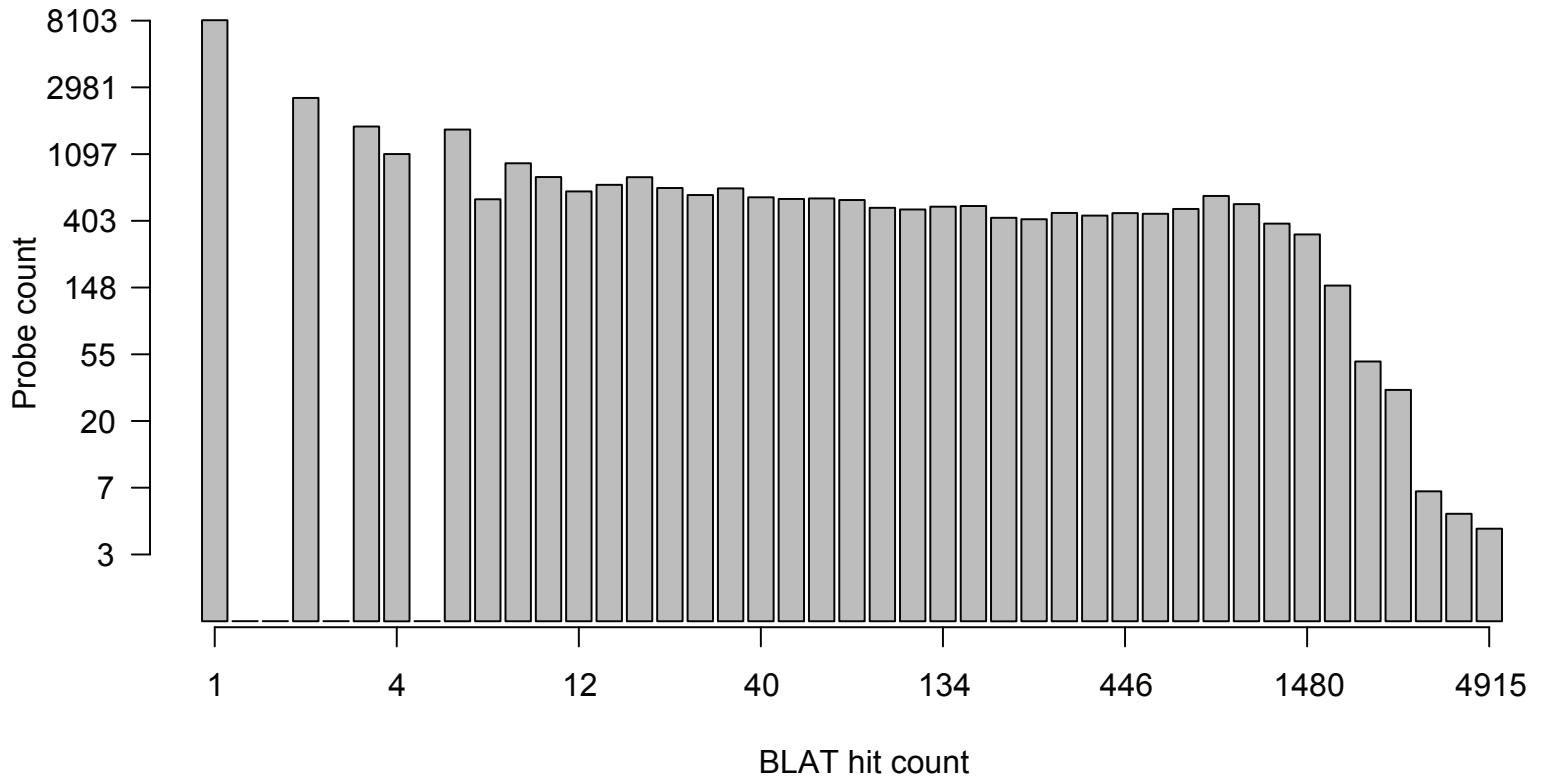

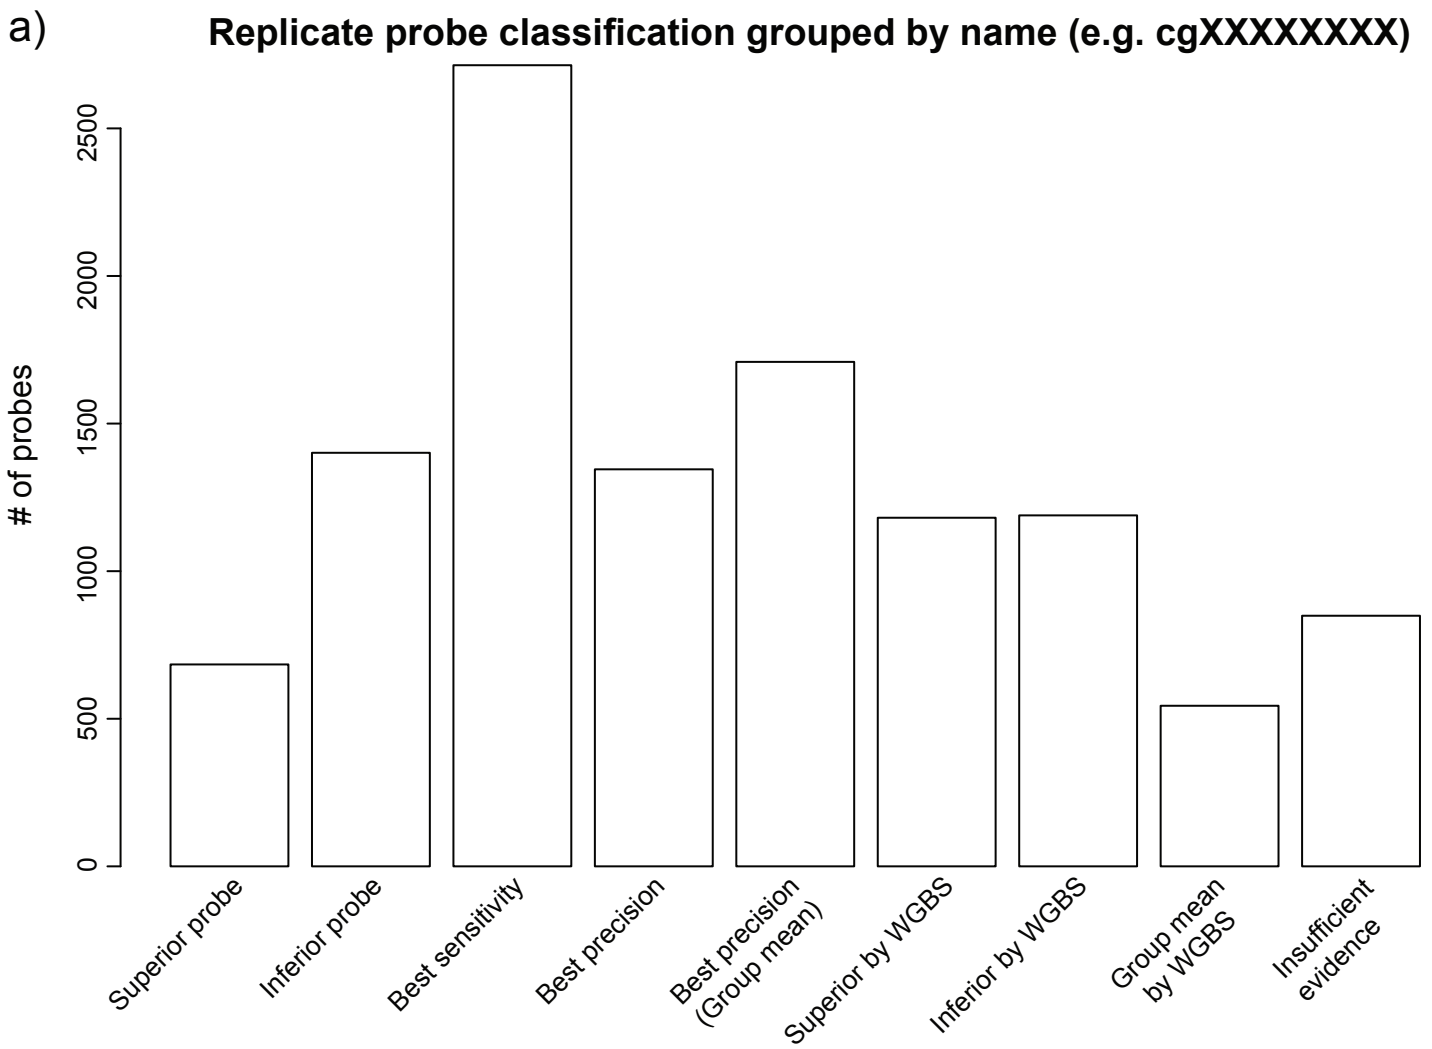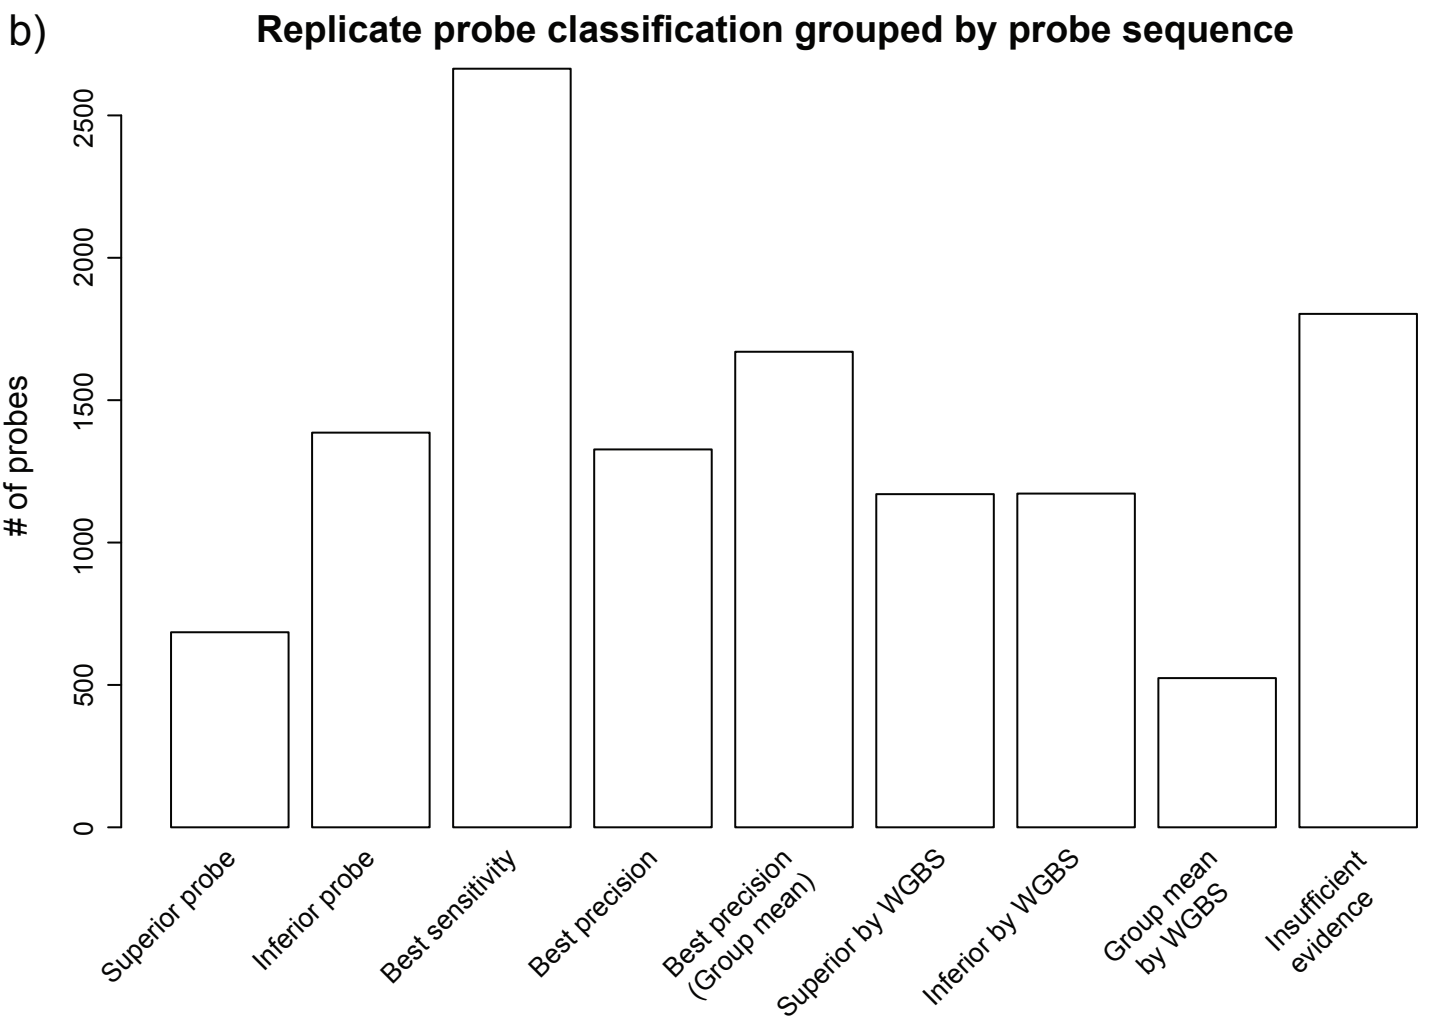

Supplementary Figure 14) Barplot of results from competitive comparison of probe replicates, where sets are grouped by a) IlmnID and b) probe sequence.
